RESEARCH ARTICLE

# Sex Differences in *Drosophila melanogaster* Heterochromatin Are Regulated by Non-Sex Specific Factors

Manasi S. Apte, Victoria H. Meller\*

Department of Biological Sciences, Wayne State University, Detroit, Michigan, 48202, United States of America

\* [vmeller@biology.biosci.wayne.edu](mailto:vmeller@biology.biosci.wayne.edu)

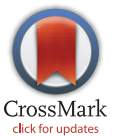

**OPEN ACCESS**

**Citation:** Apte MS, Meller VH (2015) Sex Differences in *Drosophila melanogaster* Heterochromatin Are Regulated by Non-Sex Specific Factors. PLoS ONE 10(6): e0128114. doi:10.1371/journal.pone.0128114

**Academic Editor:** Anton Wutz, Wellcome Trust Centre for Stem Cell Research, UNITED KINGDOM

**Received:** February 19, 2015

**Accepted:** April 22, 2015

**Published:** June 8, 2015

**Copyright:** © 2015 Apte, Meller. This is an open access article distributed under the terms of the [Creative Commons Attribution License](https://creativecommons.org/licenses/by/4.0/), which permits unrestricted use, distribution, and reproduction in any medium, provided the original author and source are credited.

**Data Availability Statement:** All relevant data are within the paper and supporting information files.

**Funding:** This work was supported by National Science Foundation 0641121 VHM and National Institutes of Health NIH 093110 VHM.

**Competing Interests:** The authors have declared that no competing interests exist.

## Abstract

The eukaryotic genome is assembled into distinct types of chromatin. Gene-rich euchromatin has active chromatin marks, while heterochromatin is gene-poor and enriched for silencing marks. In spite of this, genes native to heterochromatic regions are dependent on their normal environment for full expression. Expression of genes in autosomal heterochromatin is reduced in male flies mutated for the noncoding *roX* RNAs, but not in females. *roX* mutations also disrupt silencing of reporter genes in male, but not female, heterochromatin, revealing a sex difference in heterochromatin. We adopted a genetic approach to determine how this difference is regulated, and found no evidence that known X chromosome counting elements, or the sex determination pathway that these control, are involved. This suggested that the sex chromosome karyotype regulates autosomal heterochromatin by a different mechanism. To address this, candidate genes that regulate chromosome organization were examined. In XX flies mutation of *Topoisomerase II (Top2)*, a gene involved in chromatin organization and homolog pairing, made heterochromatic silencing dependent on *roX*, and thus male-like. Interestingly, Top2 also binds to a large block of pericentromeric satellite repeats (359 bp repeats) that are unique to the X chromosome. Deletion of X heterochromatin also makes autosomal heterochromatin in XX flies dependent on *roX* and enhances the effect of *Top2 mutations*, suggesting a combinatorial action. We postulate that Top2 and X heterochromatin in *Drosophila* comprise a novel karyotype-sensing pathway that determines the sensitivity of autosomal heterochromatin to loss of *roX* RNA.

## Introduction

Approximately 30% of the *Drosophila* genome is heterochromatic [1]. Many cytological and molecular features distinguish gene-poor heterochromatin from gene-rich euchromatin. Heterochromatin forms a compact, relatively inaccessible domain with ordered nucleosome arrays [2]. Heterochromatic loci tend to be near the nuclear periphery during interphase. Heterochromatin is characterized by repetitive DNA sequences, low levels of histone acetylation,

hypomethylation at H3K4 and H3K79 and enrichment for Heterochromatin Protein 1 (HP1) [3]. Although relatively gene-poor, *Drosophila* heterochromatin harbors hundreds of protein coding genes (heterochromatic genes) [1, 4]. The native heterochromatic environment has been shown essential for full expression of some of these genes, and disruption of heterochromatin lowers their expression [5–7].

Euchromatic genes also rely on their native chromatin context, and stochastic silencing is observed when a euchromatic gene is placed in a heterochromatic environment, a phenomenon known as Position Effect Variegation (PEV). PEV represents variable spreading of inactivation over the euchromatic gene, producing irregular silencing [3]. PEV is extraordinarily sensitive to heterochromatin integrity. For example, mutation of a single copy of *Su(Var)2–5*, encoding HP1, elevates expression of variegating reporters inserted in heterochromatic regions. This effect, called suppression of PEV, enables identification of genes involved in heterochromatin formation and silencing.

*Drosophila* heterochromatin is typically not thought of as sexually dimorphic. However, recent studies suggest that heterochromatin in male and female flies differs. Reduction in HP1 results in preferential lethality and higher gene misregulation in males [8]. Mutation of the *Drosophila roX1* and *roX2* RNAs (*RNA on the X 1 and -2*) is a potent suppressor of PEV for autosomal insertions in male flies, but not in females [9]. A genome-wide reduction in the expression of autosomal heterochromatic genes is also observed in *roX1 roX2* males [9]. These findings suggest a general disruption of autosomal heterochromatin in *roX1 roX2* mutants that is limited to males. Sexually dimorphic heterochromatin could stem from differential sensitivity to reduced levels of factors necessary in both sexes, or by differences in the establishment or maintenance of heterochromatin in males and females. We refer to heterochromatin as masculine if *roX* RNA is necessary for normal PEV, and a feminine if *roX* is unnecessary. This designation does not require knowledge of the mechanism through which *roX* influences heterochromatin. Interestingly, the *roX* RNAs are also essential for X chromosome dosage compensation, another male-limited process [10]. *roX* RNAs assemble with the Male Specific Lethal (MSL) proteins to form a complex that is targeted to X-linked genes. Enzymatic activities within the MSL complex modify chromatin at X-linked genes, leading to increased transcription in male flies. Most of the MSL proteins are also required for full expression of autosomal heterochromatic genes in males [9]. The only member of the MSL complex that is unnecessary for heterochromatic genes is the Male Specific Lethal 2 (MSL2) protein. This is surprising as MSL2, a key regulator of X chromosome dosage compensation, is the sole member of the MSL complex with strictly male-limited expression. This raises intriguing questions about how the sexual dimorphism of heterochromatin is determined. We postulated that heterochromatic sex is under genetic control, and conducted experiments aimed at determining the signal that regulates this process.

Using a PEV reporter assay we demonstrated that feminization of heterochromatin is independent of female-limited components of the *Drosophila* sex determination pathway. Furthermore, neither MSL2 nor the Y chromosome directs heterochromatin masculinization. We then examined the numerator elements, components of the X chromosome counting mechanism, and saw no effect on heterochromatic sex. This suggests that a novel signal, perhaps direct sensing of karyotype, could be involved. As flies pair homologous chromosomes, the sex chromosome karyotype could be detected by the presence of unpaired chromatin in XY or XO flies. Screening of viable mutations that influence chromosome organization and homologue pairing revealed that *Topoisomerase II (Top2)* contributes to the feminization of autosomal heterochromatin in XX flies. Top2 promotes homologue pairing, consistent with pairing-dependent detection of sex chromosome karyotype. However, Top2 also binds satellite repeats that make up over 10 Mb of pericentric X heterochromatin [11]. Interestingly, loss of X-heterochromatin

partially masculinizes autosomal heterochromatin in XX flies also. We propose that *Top2* and pericentromeric X heterochromatin together control the sexual differentiation of heterochromatin in *Drosophila melanogaster*. The ubiquity of Top2 and repetitive sequences suggests a general mechanism for direct detection of karyotype.

### Results

Two metrics of autosomal heterochromatic integrity are disrupted in *roX1 roX2 (roX)* males, but not females. First, expression of heterochromatic genes on the autosomes decreases in male larvae carrying the severely affected *roX1<sup>SMC17A</sup>roX2Δ* chromosome [9]. Second, adult male escapers with the partial loss of function *roX1<sup>ex33</sup>roX2Δ* chromosome display a dramatic suppression of PEV at autosomal insertions. However, no suppression of PEV or reduction in heterochromatic gene expression is detected in females with these *roX* mutations. These observations were surprising because the *roX* RNAs were not thought to play a role outside of X chromosome dosage compensation. In addition, autosomal heterochromatin is not overtly sexually dimorphic. Variegating insertions typically behave similarly in males and females, and the autosomal heterochromatic genes that are misregulated in *roX* males rarely display sex-biased expression [9]. The underlying cause of the differences in male and female heterochromatin is completely unknown. In this study, we used a genetic approach to examine this question.

Suppression of PEV increases black abdominal pigmentation from variegating *y<sup>+</sup>* reporters (Fig 1A, S1A Fig) and red eye pigmentation from variegating *w<sup>+mW.hs</sup>* reporters (S1B Fig). The 3<sup>rd</sup> chromosome insertion KV24 displays *y<sup>+</sup>* PEV in both sexes and the 2<sup>nd</sup> chromosomal insertion KV20 displays PEV in males, but typically produces less than 1 spot on each female abdomen. Suppression of PEV in *roX1<sup>ex33</sup>roX2Δ* males was observed for all the autosomal insertions tested, but no effect was observed in *roX1<sup>ex33</sup>roX2Δ* females, revealing an effect that is not unique to a specific insertion site or reporter (Fig 1A, S1 Fig and [9]).

To understand how this difference in fly heterochromatin arises, we conducted a screen for the genetic determinants of heterochromatin sexual dimorphism. This screen encompassed the sex determination pathway as well as elements of the sex chromosome karyotype. Matched

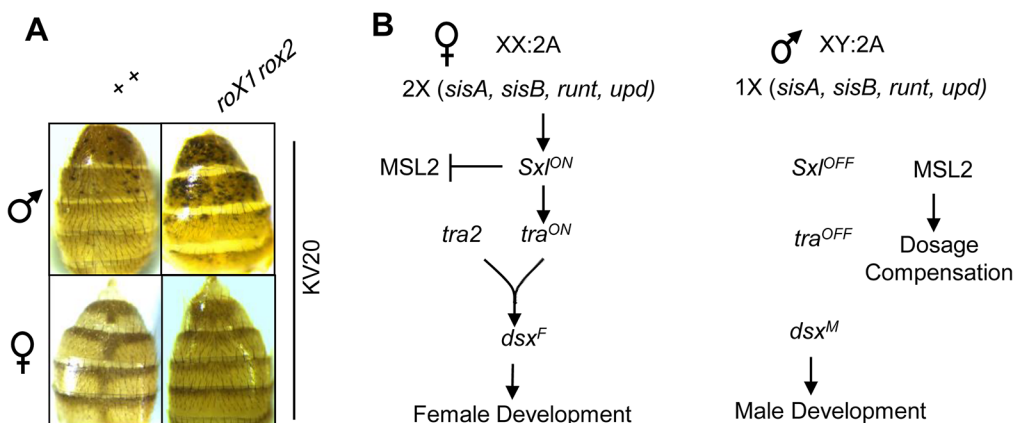

**Fig 1. Heterochromatin masculinization is revealed by position effect variegation (PEV).** (A) PEV of a *y<sup>+</sup>* marker in the KV20 insertion produces black abdominal spots. Suppression of PEV in *yw roX1<sup>ex33</sup>roX2Δ/Y; KV20/+* males increases pigmentation (top). Females (bottom) typically produce less than one spot per female, and no suppression of PEV is detected in *yw roX1<sup>ex33</sup>roX2Δ; KV20/+* females (right). (B) Somatic sex determination in flies is controlled by the number of X chromosomes. Two copies of X-linked numerator elements (*sisA, sisB, runt* and *upd*) turn on *Sexlethal (Sxl)* expression in XX embryos. *Sxl* blocks dosage compensation by preventing translation of MSL2 in XX embryos. *Sxl* ensures productive splicing of *transformer (tra)* mRNA. *tra* and *transformer2 (tra2)* induce the female-specific isoform of *doublesex (dsx<sup>F</sup>)*. Only *dsx<sup>M</sup>* is produced in males. The Dsx transcription factors coordinate visible somatic differentiation. Additional *tra* and *tra2* targets (not shown) regulate differentiation of the nervous system.

doi:10.1371/journal.pone.0128114.g001

genotypes differing only at the *roX* genes were generated to determine if heterochromatin is masculine (*roX1 roX2* mutation suppresses PEV) or feminine (no or minor suppression of PEV in *roX1 roX2* mutants) in each genetic background. *Drosophila* sex determination is triggered by the X chromosome dose (X:A, Fig 1B). The Y chromosome is believed to have no role in *Drosophila* sex determination. The two X chromosomes in female embryos initiate early expression of *Sexlethal* (*Sxl*) [12]. *Sxl* induces productive *transformer* (*tra*) splicing [13]. *Tra* and Transformer 2 (*Tra2*) direct splicing of the female isoform of the *doublesex* transcription factor (*dsx<sup>F</sup>*). Conversely, in XY embryos *Sxl* is not expressed [14, 15]. *Sxl* represses MSL2 translation [16–18]. As MSL2 is a key protein in X chromosome dosage compensation, this limits dosage compensation to males. The absence of *Sxl* in males also prevents *tra* expression, resulting in the production of default male isoform of *dsx* (*dsx<sup>M</sup>*). We hypothesized that genes in the sex determination pathway, or the Y chromosome, might control the observed sexual dimorphism of heterochromatin.

We first considered the possibility that a male-limited factor masculinizes heterochromatin. The Y chromosome is thought to act as a sink for heterochromatin proteins, and thus has epigenetic effects throughout the genome [19, 20]. We generated males with a variegating *w<sup>+mW.hs</sup>* marker (insertion 118E-10) that were wild type for the *roX* genes or carried the partial loss of function *roX1<sup>ex33</sup>* mutation and a deletion of *roX2*, a combination that allows over 20% escaper males. Eyes of control males (*yw/Y*; 118E-10/+) have an average of 20% pigmented facets (black bars, Fig 2A), but *yw roX<sup>ex33</sup>roX2/Y*; 118E-10/+ males display over 90% pigmentation, a dramatic suppression of PEV (red bars, Fig 2A). The absence of a Y chromosome in XO males frees heterochromatin proteins to reinforce silencing and enhance PEV at other loci [20]. As expected, PEV was enhanced in XO males with wild type *roX* genes, almost 90% of which have no eye pigmentation (*yw/O*; 118E-10/+; white bars in Fig 2A). We then asked whether PEV in XO males was suppressed by *roX* mutations, and found that all *yw roX<sup>ex33</sup>roX2/O*; 118E-10/+ males display at least some eye pigmentation (green bars in Fig 2A). Since the loss of *roX* suppresses PEV in otherwise identical XO males (compare white and green bars in Fig 2A), we conclude that the presence of the Y chromosome is not responsible for masculine heterochromatin in males.

The protein Male Specific Lethal-2 (MSL2) binds the *roX* RNAs and is the only male-limited member of the dosage compensation complex [21–23]. To determine if MSL2 plays a role in heterochromatin masculinization, we expressed MSL2 from the [H83M2]6I transgene in XX females with a variegating *y<sup>+</sup>* reporter (insertion KV20), and compared females that were either wild type or mutated for the *roX* genes [23–25]. This, and following studies utilize *roX2Δ* a simple deletion that facilitates stock construction [26]. PEV in females expressing MSL2 is not influenced by *roX* mutations (Fig 2B, bottom). In contrast, *roX* mutations suppress PEV in males of matched genetic background (Fig 2B, top). This is consistent with a study finding that MSL2 is not required for full expression of autosomal heterochromatic genes in males [9]. As MSL2 appears to have no role in either measure of sexually dimorphic heterochromatin, we conclude that it does not masculinize heterochromatin.

Loss of *roX* RNAs in males leads to relocalization of MSL proteins to the chromocenter, a structure composed of pericentromeric heterochromatin from all chromosomes. Identical MSL mislocalization is also observed in *roX1 roX2* females that ectopically express MSL2 [9]. In spite of the abnormal recruitment of MSL proteins to the chromocenter, no disruption of heterochromatic gene expression or PEV can be detected in *roX1 roX2* females that ectopically express MSL2 (Fig 2B and [9]). We conclude that mislocalization of MSL proteins does not produce the disruptions in heterochromatin function that are observed in *roX1 roX2* mutants.

We then addressed the possibility that female-limited proteins in the somatic sex determination pathway feminize autosomal heterochromatin. If this is the case, mutations in this

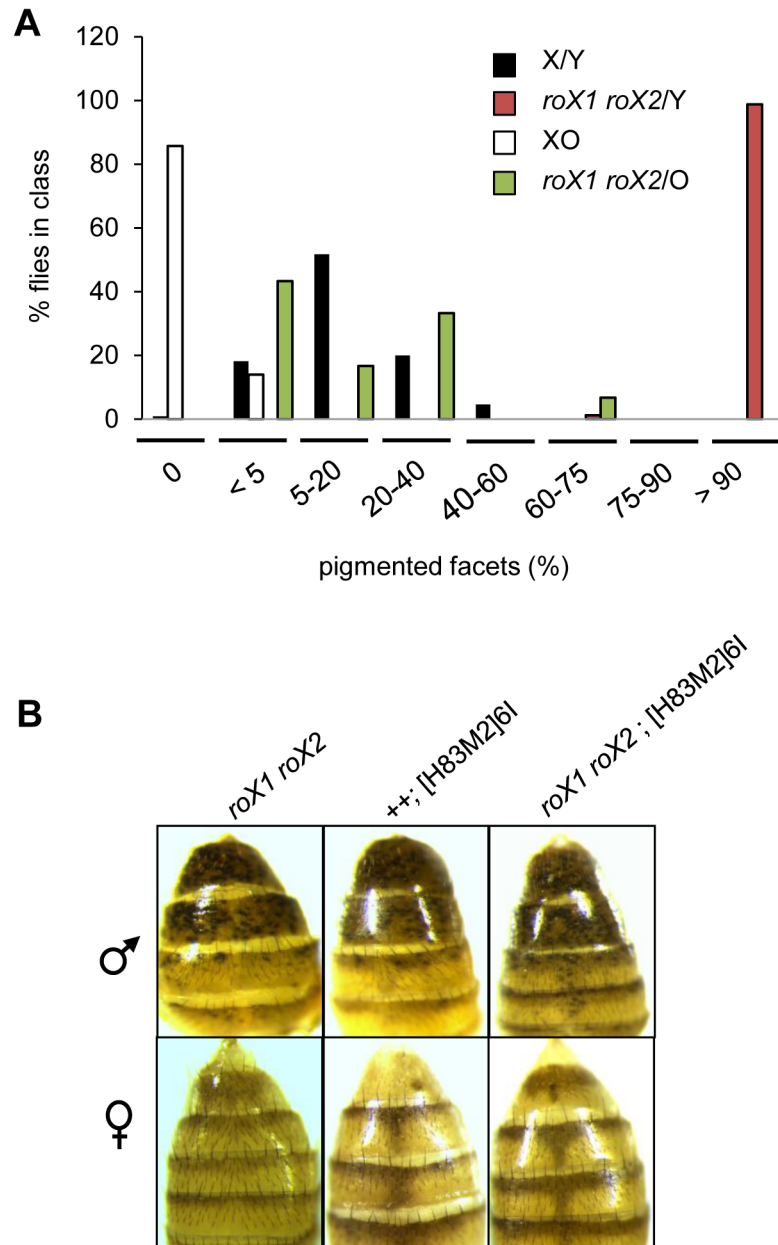

**Fig 2. Neither the Y chromosome nor MSL2 direct heterochromatin masculinization.** (A) Eye pigmentation was examined in flies with a variegating marker ( $w^{+mW.hs}$ ) in the 118E-10 insertion. In XY males (black and red bars) loss of *roX* (red) dramatically suppresses PEV. XO males display stronger silencing (white and green bars) but loss of *roX* (green) still suppresses PEV. Full genotypes and number of individuals scored are: black,  $yw/Y$ ; 118E-10/+, 110, white,  $yw/O$ ; 118E-10/+, 21, red,  $yw roX1^{ex33} roX2\Delta/Y$ ; 118E-10/+, 83 and green,  $yw roX1^{ex33} roX2\Delta/O$ ; 118E-10/+, 30. (B) MSL2 does not masculinize XX heterochromatin. Ectopic MSL2 expression from the [H83M2]6I transgene does not lead to suppression of PEV in  $yw roX1^{ex33} roX2\Delta$  females. PEV of  $y^+$  KV20 is suppressed in  $yw roX1^{ex33} roX2\Delta$  males, and remains unchanged by increased MSL2 expression. At least 50 flies were scored per genotype. Representative male (top) and female (bottom) adults are presented.

doi:10.1371/journal.pone.0128114.g002

pathway will masculinize heterochromatin in XX flies (Fig 3A). We tested *Sexlethal* (*Sxl*), *transformer2* (*tra2*) and *doublesex* (*dsx*), representing different levels in the sex determination hierarchy (Fig 1B, left). As these genes direct female somatic differentiation, mutations produce XX



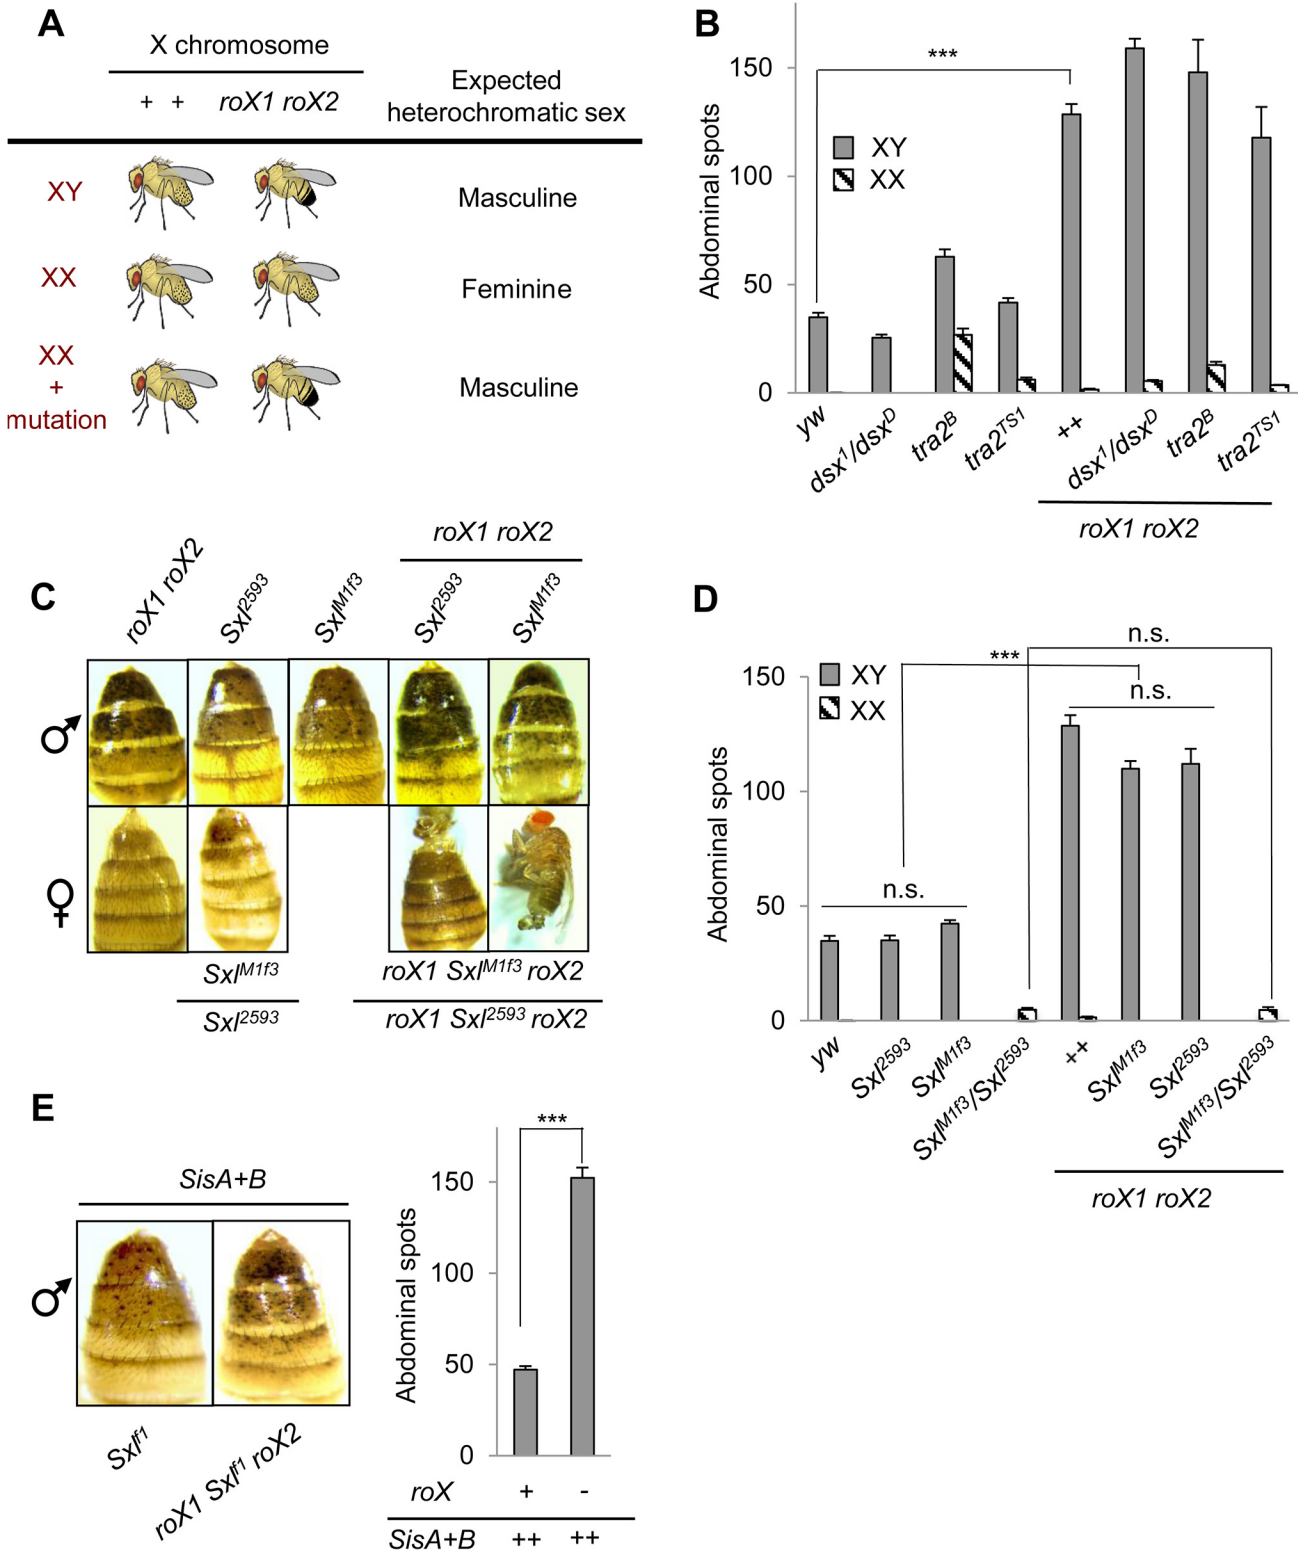

**Fig 3. The somatic sex determination pathway and numerator elements do not control heterochromatin feminization.** (A) Scheme for identification of genetic regulators of heterochromatic sex. Heterochromatin is masculine if loss of *roX* suppresses PEV of an autosomal reporter. If a gene in the sex determination cascade normally feminizes XX heterochromatin, mutation of that gene will masculinize XX heterochromatin, leading to suppression of PEV in *roX* mutants. (B) *tra2* and *dsx* do not feminize heterochromatin. *yw roX1<sup>ex33</sup> roX2Δ / B<sup>S</sup>Y*; *KV20/+* males with *tra2<sup>B</sup>*, *tra2<sup>Ts1</sup>* or *dsx<sup>1</sup>/dsx<sup>D</sup>* mutations display suppression of PEV, detected by increased abdominal pigmentation (gray bars at right). XX pseudomales and intersexes display a modest increase in spots,

consistent with masculinization of pigmentation patterns (hatched bars). However, no suppression of PEV is observed in *roX* pseudomales. Full genotypes (left to right) are: *yw*; *KV20/+*, *yw*; *KV20/+*; *dsx<sup>1</sup>/dsx<sup>D</sup>*, *yw*; *tra2<sup>B</sup> KV20/ tra2<sup>B</sup>*, *yw*; *tra2<sup>TS1</sup> KV20/ tra2<sup>TS1</sup>*, *yw roX1<sup>ex33</sup>roX2Δ*; *KV20/+*, *yw roX1<sup>ex33</sup>roX2Δ*; *KV20/+*; *dsx<sup>1</sup>/dsx<sup>D</sup>*, *yw roX1<sup>ex33</sup>roX2Δ*; *tra2<sup>B</sup> KV20/ tra2<sup>B</sup>*, *yw roX1<sup>ex33</sup>roX2Δ*; *tra2<sup>TS1</sup> KV20/ tra2<sup>TS1</sup>*. Twenty-50 individuals of each genotype were scored. (C) *Sxl* mutations do not masculinize XX heterochromatin. Representative XY (top) and XX (bottom) flies are shown. XY flies with *Sxl* mutations suppress PEV upon loss of *roX* function (right two panels). XX *Sxl<sup>M1,f3</sup>/Sxl<sup>2593</sup>* pseudomales display partial masculinization of genitalia and pigmentation, but no suppression of PEV is observed upon *roX* mutation. (D) Abdominal pigmentation in *Sxl* adults. Full genotypes of XY flies (gray bars): *yw/Y*; *KV20/+*, 75 flies, *yw Sxl<sup>2593</sup>/Y*; *KV20/+*, 75 flies, *yw Sxl<sup>M1,f3</sup>/Y*; *KV20/+*, 64 flies, *yw roX1<sup>ex33</sup>Sxl<sup>M1,f3</sup>roX2Δ/Y*; *KV20/+*, 17 flies, *yw roX1<sup>ex33</sup>Sxl<sup>2593</sup>roX2Δ/Y* *KV20/+*, 37 flies. Full genotypes of XX flies (hatched bars): *yw Sxl<sup>M1,f3</sup>/yw Sxl<sup>2593</sup>* *KV20/+*, 21 flies, *yw roX1<sup>ex33</sup>Sxl<sup>M1,f3</sup>roX2Δ/yw roX1<sup>ex33</sup>Sxl<sup>2593</sup>roX2Δ* *KV20/+*, 10 flies. (*p*-value \*\*\*<0.00001, *n*. *s* = non-significant). (E) Numerator elements do not feminize XY heterochromatin. Overexpression of *SisA* and *SisB* is indicated by ++. Full genotypes: *ywSxl<sup>f1</sup>/Y*; *2XP(w<sup>+mC</sup>,sisA<sup>+</sup>)*+ *2XP(w<sup>+mC</sup>,sc<sup>sisB+</sup>)*/*KV20* and *yw roX1<sup>ex33</sup>Sxl<sup>f1</sup>roX2Δ/Y*; *2XP(w<sup>+mC</sup>,sisA<sup>+</sup>)*+*2XP(w<sup>+mC</sup>,sc<sup>sisB+</sup>)*/*KV20*. Data was derived from over 20 individuals per genotype. \*\*\* indicates *p*-value <0.00001.

doi:10.1371/journal.pone.0128114.g003

intersexes or pseudomales with male-like body pigmentation and altered genital morphology. *dsx<sup>1</sup>* is amorphic and *dsx<sup>D</sup>* produces the male splice form. XX; *dsx<sup>1</sup>/dsx<sup>D</sup>* flies are fully masculinized. We generated X/Y; *dsx<sup>1</sup>/dsx<sup>D</sup>* and XX; *dsx<sup>1</sup>/dsx<sup>D</sup>* flies with *KV20* and the *yw roX1<sup>ex33</sup>roX2Δ* chromosome. Masculinized XX; *dsx<sup>1</sup>/dsx<sup>D</sup>* flies were distinguished from XY flies by the absence of a marked Y chromosome (*B<sup>S</sup>Y*). Masculinization increased abdominal pigmentation, allowing detection of more *y<sup>+</sup>* spots in XX flies. Because of this, comparisons must be between flies with the same *dsx* status. Although *yw roX1<sup>ex33</sup>roX2Δ/ B<sup>S</sup>Y*; *KV20/+*; *dsx<sup>1</sup>/dsx<sup>D</sup>* males displayed strong suppression of PEV in comparison to males with wild type *roX*, no suppression of PEV was observed in XX; *dsx<sup>1</sup>/dsx<sup>D</sup>* pseudomales upon loss of *roX* (compare *yw roX1<sup>ex33</sup>roX2Δ*; *KV20/+*; *dsx<sup>1</sup>/dsx<sup>D</sup>* and *yw*; *KV20/+*; *dsx<sup>1</sup>/dsx<sup>D</sup>*, Fig 3B).

We next tested the *tra2<sup>ts1</sup>* and *tra2<sup>B</sup>* mutations. *tra2<sup>ts1</sup>* is a temperature sensitive hypomorph and *tra2<sup>B</sup>* is a null allele. Loss of *tra2* has no visible effect on XY flies but masculinizes XX flies. We generated XX and XY *tra2* mutants carrying *KV20* and *yw roX1<sup>ex33</sup>roX2Δ*. Loss of *roX* suppressed PEV in *tra2/ tra2* males (Fig 3B). In contrast, XX; *tra2/ tra2* pseudomales mutated for *roX* displayed no suppression of PEV (Fig 3B).

Although *dsx* and *tra2* do not regulate heterochromatin sexual differentiation, it remained possible that *Sxl*, the master regulator of sexual determination, did so through a different pathway. Since null *Sxl* mutations are embryonic lethal in XX zygotes, we tested a heteroallelic combination, *Sxl<sup>M1,f3</sup>/Sxl<sup>2593</sup>*, that produces masculinized XX adult escapers. The *roX* genes and *Sxl* are X-linked, necessitating generation of two *roX1<sup>ex33</sup> Sxl roX2Δ* chromosomes. Control masculinized XX adults (*yw Sxl<sup>M1,f3</sup>/yw Sxl<sup>2593</sup>*; *KV20/+*) emerged late and displayed developmental defects and partial sexual transformation (Fig 3C, bottom). Similar to XX flies masculinized by *tra2* and *dsx*, a few abdominal spots were visible. However, mutation of *roX* had no effect on PEV in XX flies that were masculinized by *Sxl* mutations (Fig 3D, hatched bars). In contrast, XY males mutated for *roX* and *Sxl* displayed strong suppression of PEV (Fig 3C and 3D). This supports the idea that sexual differentiation of heterochromatin is independent of the somatic sex determination pathway. One caveat is that this test requires adult escapers, preventing use of null *Sxl* alleles. It remains possible that a novel *Sxl* function is retained in the heteroallelic combination tested. *Sxl* regulates *roX1* expression by repression of MSL2 [27, 28]. One possibility is that *Sxl* regulates heterochromatic sexual differentiation by modulating *roX1* levels in early embryos. For example, high *roX1* RNA concentrations could establish male heterochromatin. Repression of MSL2 by *Sxl* in females reduces *roX1* levels. Arguing against this idea is the observation that ectopic expression of MSL2 fails to masculinize heterochromatin. Furthermore, *roX1* is abundant in early embryos of both sexes, and pseudomales generated using a similar heteroallelic *Sxl* combination have elevated *roX1* levels[29][30]. However, none of these manipulations activate dosage compensation or *roX1* expression to the level observed in normal males. Nevertheless, the stability of heterochromatic sex in genetic backgrounds mutated for *tra* and *dsx* suggests genetic regulation at the level of *Sxl* or above.

A mechanism that detects sex chromosome karyotype could bypass the sex determination cascade altogether. One way this could occur is if the X chromosome counting mechanism that turns on *Sxl* in XX embryos also controls a second pathway that leads to heterochromatin feminization. Proteins from the X-linked *sisterless A and B* (*sisA* and *sisB*), *unpaired* (*upd*) and *runt* (*runt*) genes, collectively known as numerator elements, promote early *Sxl* expression in XX embryos [31–34]. Elevated *sisA* and *sisB* expression is benign in XX flies but turns on *Sxl* expression in XY flies, a lethal situation that can be overcome by mutating *Sxl* [35, 36]. We examined heterochromatin sexual differentiation in XY flies with multiple *sisA* and *sisB* transgenes and the *Sxl<sup>l</sup>* mutation. We found normal PEV in control males that have wild type *roX* and overexpress *sisA* and *sisB*, but strong suppression of PEV when *roX* mutations are introduced into this genotype, revealing stable heterochromatin masculinization (Fig 3E). We conclude that *sisA* and *sisB*, key components of the X chromosome counting mechanism, do not feminize heterochromatin.

Another possible mechanism for detection of karyotype involves chromosome pairing. Interphase chromosomes of *Drosophila* are paired throughout development [37–39]. All homologs pair in females, but the structurally dissimilar X and Y chromosomes of males remain unpaired. In theory, unpaired chromatin in XY and XO cells could signal the male karyotype.

To investigate this possibility, we examined several genes that regulate homolog pairing in *Drosophila* [39, 40]. Three pairing promoters, *Topoisomerase II* (*Top2*), *Dynein Heavy chain-64c* (*Dhc64c*) and *Microcephalin-1* (*MCPH1*), and three anti-pairers, *condensin II* subunits *Cap-H2* and *Cap-D3*, and *Female sterile (1) homeotic* (*fs(1)h*) were examined. Some of these are essential, requiring the use of partial loss of function mutations, or heteroallelic combinations that produce adult escapers. HP1, an anti-pairing gene, was not selected for the screen, as mutation of HP1 is a potent suppressor of PEV regardless of sex. If fully paired chromosomes signal the XX karyotype, and this in turn regulates heterochromatic sex, mutation of anti-pairers will increase pairing, leading to feminization of autosomal heterochromatin in XY animals. We generated XX and XY flies with KV20 and viable mutations in individual anti-pairers. Each was constructed with wild type or mutated *roX* genes. Abdominal spots were minimal, but unchanged, in *roX* mutant females. Males with *Cap-H2*<sup>Z0019</sup>, *Cap-D3*<sup>c07081</sup> or *fs(1)h*<sup>1</sup> mutations continued to suppress PEV when mutated for *roX* (S2 Fig, compare gray and black bars). We conclude that mutation of these anti-pairing factors does not lead to feminization of heterochromatin in males.

We then tested mutations in pairing promoters. These mutations reduce pairing, a condition that could mimic the unpaired chromatin of males. If unpaired chromatin signals the XY karyotype, reduced pairing in XX flies could inappropriately masculinize heterochromatin. We first generated individual XX and XY flies with loss of function mutations in *Dhc64c* or *MCPH1*, KV20, and wild type or mutated for the *roX* genes. XY flies mutated for *Dhc64c* or *MCPH1* continued to show suppression of PEV when mutated for *roX* (*yw roX1<sup>ex33</sup> roX2ΔY*; *MCPH1*<sup>0978</sup> KV20 / *MCPH1*<sup>0978</sup> and *yw roX1<sup>ex33</sup> roX2ΔY*; KV20 / +; *dhc64c*<sup>6-10</sup> / *dhc64c*<sup>8-1</sup>) (S2 Fig, gray bars). However, no masculinization of heterochromatin was apparent in females mutated for *Dhc64c* or *MCPH1* (S2 Fig, hatched bars).

We then tested *Top2*, a pairing promoter with critical roles in nuclear organization, cell division and DNA repair. Since loss of *Top2* is lethal, the complementing heteroallelic *Top2*<sup>17-1</sup> / *Top2*<sup>17-3</sup> combination was used [41]. Each mutation is individually lethal, but *Top2*<sup>17-1</sup> / *Top2*<sup>17-3</sup> flies display >50% viability. *Top2*<sup>17-1</sup> (S791F) in the WHD domain reduces protein accumulation, but *Top2*<sup>17-3</sup> (L471Q) in the TOPRIM domain produces stable, full-length protein (S3A Fig). We generated *Top2*<sup>17-1</sup> / *Top2*<sup>17-3</sup> XX and XY flies with variegating *y*<sup>+</sup> (KV24 insertion) that were in addition either wild type or mutated for the *roX* genes. The switch to the 3<sup>rd</sup> chromosome KV24 was necessitated by our inability to recover a recombinant second chromosome with



KV20 and *Top2*. We observed that *Top2*<sup>17-1</sup>/*Top2*<sup>17-3</sup> itself suppressed PEV in males, but not in females, thus identifying an additional difference in the heterochromatin of males and females (Fig 4A and 4B). Surprisingly, *Top2*<sup>17-1</sup>/*Top2*<sup>17-3</sup> females displayed highly significant suppression of PEV upon loss of *roX*, suggesting masculinization of XX heterochromatin by *Top2* mutation (Fig 4B). However, mutation of *Top2* does not otherwise sexually transform XX flies, which display female morphology.

*Top2* was the sole pairing promoter that altered the sexual differentiation of heterochromatin, raising questions about the precise molecular function that is disrupted by the mutations used. *Top2*<sup>17-1</sup>/*Top2*<sup>17-3</sup> males are fertile, but embryos deposited by *Top2*<sup>17-1</sup>/*Top2*<sup>17-3</sup> females fail to hatch (S3B Fig). No evidence of DNA replication could be detected in these embryos by DNA staining (not shown), consistent with meiotic or mitotic failure [42]. We conclude that meiosis, fertilization or embryonic development of *Top2*<sup>17-1</sup>/*Top2*<sup>17-3</sup> mutants requires maternal provision of wild type *Top2*.

We then examined polytene preparations from wild type and *Top2*<sup>17-1</sup>/*Top2*<sup>17-3</sup> larvae to determine if there was a visible effect on chromosome organization. Similar heteroallelic *Top2* mutants have been shown to disrupt the male X-chromosome [41]. We scored chromosome morphology as abnormal if banding was diffuse and puffy if the chromosome was bloated along its entire length. Chromosomes from *Top2* mutants are more susceptible to breaking, suggesting fragility. Seventy percent of male nuclei from *Top2* mutants had abnormal or puffy X chromosomes (S3C Fig, black arrows), but only 14% of X chromosomes from wild-type males were scored as abnormal. *Top2* mutant females and wild type females display similar levels of X chromosome abnormality (10–15%). Fifty percent of nuclei from *Top2* mutants had partially unpaired homologs, in contrast to 15% from wild type larvae (S3C Fig, white arrows, S1 Table). The size, position and extent of unpairing varied between nuclei, and unpaired regions were equally prevalent in males and females. As most of the genome remains paired, this defect appears relatively minor. In summary, examination of chromosomes suggests selective disruption of male X-chromosome polytenization in *Top2* mutant larvae and homolog pairing that remains largely intact.

We then examined homolog pairing using a genetic assay. Pairing enables enhancers from one mutant allele to drive the promoter of a different allele, thus restoring expression (transvection). Transvection at *yellow* (*y*) is detected by increased pigmentation. While *y*<sup>82f29</sup> is a deletion of upstream enhancer elements, *y*<sup>1#8</sup> retains enhancers but lacks a promoter. Transvection in *y*<sup>82f29</sup>/*y*<sup>1#8</sup> flies restores body, wing and bristle color (S3D Fig). *y*<sup>3c3</sup> lacks a bristle enhancer and the *y* promoter, but retains a wing enhancer. Transvection in *y*<sup>82f29</sup>/*y*<sup>3c3</sup> flies restores wing pigmentation (S3 Fig). Flies homozygous for any one of these alleles have light bodies, wings and bristles. Heteroallelic *y*<sup>82f29</sup>/*y*<sup>1#8</sup> and *y*<sup>82f29</sup>/*y*<sup>3c3</sup> flies in wild type and *Top2*<sup>17-1</sup>/*Top2*<sup>17-3</sup> mutant backgrounds displayed equivalent transvection (S3D and S3E Fig). We conclude that *Top2*<sup>17-1</sup>/*Top2*<sup>17-3</sup> mutants retain sufficient homolog pairing to support transvection at *y*. Although no defect in *y* pairing was observed by this test, it is formally possible that the *Top2* mutants we tested are defective for pairing at other loci.

The *y*<sup>2</sup> allele is produced by a *Gypsy* insulator that prevents wing and body enhancers from contacting the promoter. *Top2* is necessary for *Gypsy* insulation, and loss of *Top2* restores pigmentation in the wing and body of *y*<sup>2</sup> flies [43]. We examined insulator function by comparing pigmentation in *y*<sup>2</sup> males that are wild type and *Top2*<sup>17-1</sup>/*Top2*<sup>17-3</sup>. No increase in body or wing color could be detected in *y*<sup>2</sup>/*Y*; *Top2*<sup>17-1</sup>/*Top2*<sup>17-3</sup> flies (S3F Fig). We conclude that the *Top2*<sup>17-1</sup>/*Top2*<sup>17-3</sup> flies retain *Gypsy* insulator function, consistent with tests of other viable heteroallelic *Top2* combinations [44].

*Top2* was recently reported to participate in dosage compensation [45]. In support of this idea, a physical interaction between *Top2* and Maleless (MLE), an RNA helicase that is a

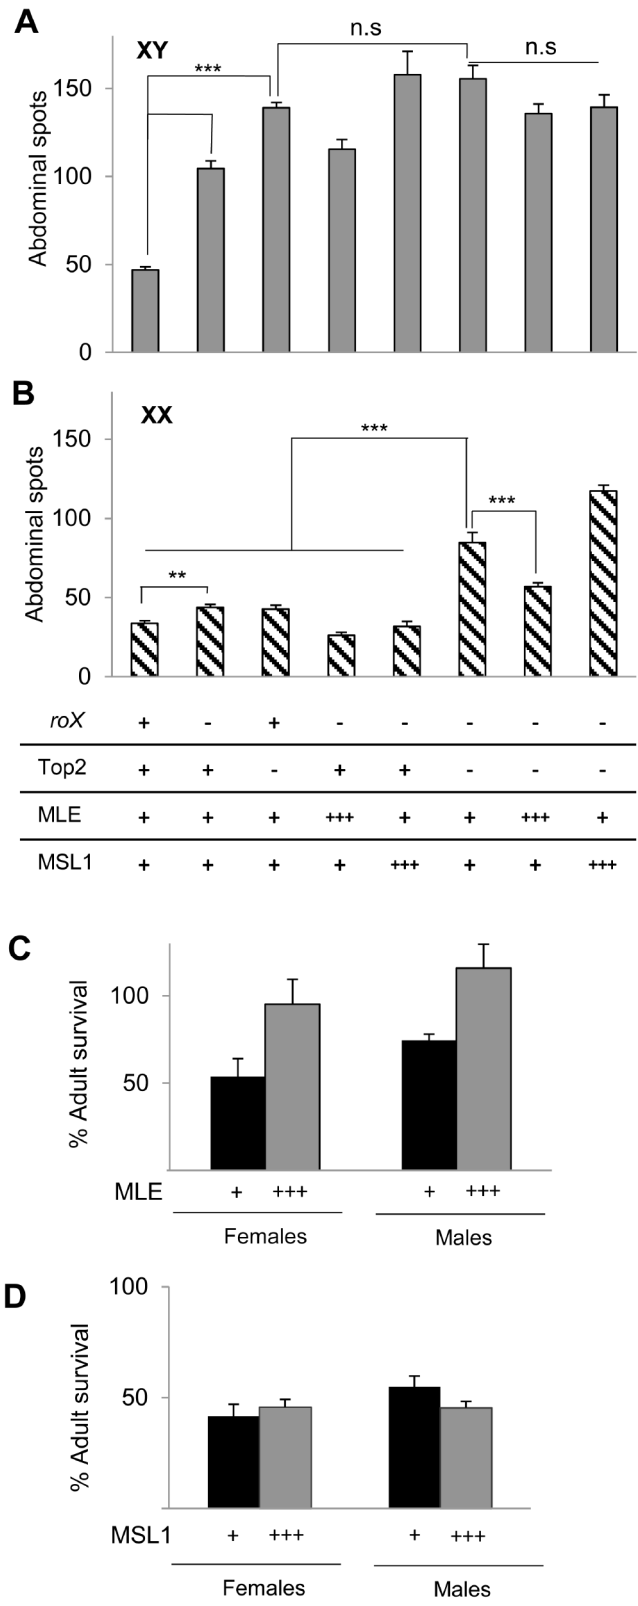

**Fig 4. Mutation of *Topoisomerase II (Top2)* masculinizes XX heterochromatin.** (A) PEV is suppressed in males mutated for *roX* or *Top2*. Ectopic MLE or MSL1 expression does not restore PEV in *roX* or *Top2* mutants. Twenty-50 flies of each genotype were scored. *p*-values: \*\* <0.0001; \*\*\* <0.00001; n.s non-

significant. (B) Suppression of PEV in *Top2* females mutated for *roX*. Pigmentation displays little or no increase in XX flies mutated for *roX* or *Top2* alone (left three bars). Simultaneous mutation of *roX* and *Top2* leads to suppression of PEV. Over expression of MLE, but not MSL1, partially restores PEV in *roX* and *Top2* females (right two bars). (for A, B) Wild type (+) and mutant (-) for indicated genes; (+++) overexpressing transgenes. Full genotypes (left to right) *yw*; KV24/+, *yw roX1<sup>ex33</sup>roX2Δ*; KV24/+, *yw*; *Top2<sup>17-1</sup>/Top2<sup>17-3</sup>*; KV24/+, *yw roX1<sup>ex33</sup>roX2Δ*; [H83MLE]/+; KV24/+, *yw roX1<sup>ex33</sup>roX2Δ*; +/+; KV24/[H83M1]Z1, *yw roX1<sup>ex33</sup>roX2Δ*; *Top2<sup>17-1</sup>/Top2<sup>17-3</sup>*; KV24/+, *yw roX1<sup>ex33</sup>roX2Δ*; *Top2<sup>17-1</sup>/Top2<sup>17-3</sup>*; [H83MLE]; KV24/+, *yw roX1<sup>ex33</sup>roX2Δ*; *Top2<sup>17-1</sup>/Top2<sup>17-3</sup>*; KV24/[H83M1]Z1. (C) Overexpression of MLE rescues *Top2* lethality in both sexes. *yw*; *Top2<sup>17-1</sup>/CyO y<sup>+</sup>* females were mated to *yw*; *Top2<sup>17-3</sup>/CyO y<sup>+</sup>* or *yw*; *Top2<sup>17-3</sup>[H83 MLE]/CyO y<sup>+</sup>* males. Survival of *yw*; *Top2<sup>17-1</sup>/Top2<sup>17-3</sup>* (black) and *yw*; *Top2<sup>17-1</sup>/Top2<sup>17-3</sup>[H83 MLE]* (gray) was calculated by setting recovery of flies with *CyO y<sup>+</sup>* to 100%. Data was compiled from at least 3 replicate matings. (D) Overexpression of MSL1 does not rescue *Top2<sup>17-1</sup>/Top2<sup>17-3</sup>* survival. *yw*; *Top2<sup>17-1</sup>/In(2LR)GlaBc* females were mated to *yw/Y*; *Top2<sup>17-3</sup>/In(2LR)GlaBc*; [H83M1]Z1/+ males. Survival of *yw*; *Top2<sup>17-1</sup>/Top2<sup>17-3</sup>* (black) and *yw*; *Top2<sup>17-1</sup>/Top2<sup>17-3</sup>*; [H83M1]Z1/+ (gray) was calculated by setting recovery of flies with *In(2LR)GlaBc* to 100%. Survival is derived from 5 replicate matings.

doi:10.1371/journal.pone.0128114.g004

member of the dosage compensation complex, was detected. Based on this, and the disruption of X chromosome morphology in male *Top2<sup>17-1</sup>/Top2<sup>17-3</sup>* mutants, we asked whether *Top2<sup>17-1</sup>/Top2<sup>17-3</sup>* affects males more strongly than females. Interestingly, *Top2<sup>17-1</sup>/Top2<sup>17-3</sup>* flies do not display male-preferential lethality, suggesting that these mutations do not affect the dosage compensation function of *Top2* (Fig 4C, black bars). The association between *Top2* and MLE prompted us to ask whether overexpression of MLE from a transgene [H83 MLE] could influence the survival of *Top2<sup>17-1</sup>/Top2<sup>17-3</sup>* flies. MLE overexpression dramatically rescued *Top2<sup>17-1</sup>/Top2<sup>17-3</sup>* mutants of both sexes (Fig 4C, gray). However, no rescue of *Top2* mutants was achieved by overexpression of another member of the dosage compensation complex, *male-specific lethal 1 (msl1)* (Fig 4D). Our data supports the idea of an interaction between *Top2* and MLE, but the lack of sex-specificity of rescue argues against a role that is limited to dosage compensation.

The increased survival of *Top2<sup>17-1</sup>/Top2<sup>17-3</sup>* mutants upon MLE overexpression prompted us to ask if MLE could restore heterochromatin function in *Top2* mutants. To address this we generated *Top2<sup>17-1</sup>/Top2<sup>17-3</sup>* mutants that overexpress MLE, carry the KV24 reporter and are either wild type or mutant for the *roX* genes. Increased MLE expression failed to restore PEV in males mutated for *roX* and *Top2* (Fig 4A). In contrast, expression of MLE in *roX* and *Top2* mutant females achieved significant restoration of PEV (Fig 4B). However, overexpression of MSL1 failed to restore PEV in *roX* and *Top2* mutant females (Fig 4B). Taken together, these findings support the idea that a *Top2*—MLE interaction is necessary for a process other than compensation, but the basis for the sex-specific effect of MLE on restoration of female PEV is speculative at present. However, MLE is part of the MSL complex, making it plausible that recruitment of MLE to the male X chromosome reduces its availability for interaction with *Top2* on autosomal heterochromatin, producing the observed differences in response to overexpression.

The involvement of *Top2* in a process that may be triggered by sex chromosome karyotype suggested an alternative mechanism. Over 10 Mb of X heterochromatin is composed of satellite repeats (359 bp repeats) that are unique to the X chromosome [39, 46]. Interestingly, the 359 bp repeats bind *Top2* in interphase nuclei [11, 47]. This suggested the possibility that an interaction between X heterochromatin and *Top2* determines differential heterochromatin sensitivity to loss of *roX*. If this is the case, deletion of X heterochromatin may act similarly to *Top2* mutation. The X;Y translocation *Zhr<sup>1</sup>* replaces X heterochromatin with part of the Y chromosome [48, 49]. We generated *roX* mutant females that were heterozygous for *Zhr<sup>1</sup>* and carry KV20 (*yw roX1<sup>ex33</sup> roX2Δ Zhr<sup>1</sup> / yw roX1<sup>ex33</sup> roX2Δ +*; KV20/+). Interestingly, weak suppression of PEV was observed in *roX* females with a single *Zhr<sup>1</sup>* chromosome, but not in *Zhr<sup>1</sup>* females wild type for *roX* (Fig 5A). As removal of one copy of X heterochromatin generates XX

females that now depend on *roX* for normal autosomal PEV, loss of X heterochromatin partially masculinizes autosomal heterochromatin in these flies.

The involvement of Top2 in homolog pairing, and its localization at the 359 bp repeats, suggested the possibility that a large block of unpaired 359 bp repeats itself could signal the XY karyotype. If this is the case, *Zhr<sup>1</sup>/Zhr<sup>1</sup>* females, which have no unpaired 359 bp repeats, should display feminine heterochromatin. In contrast to this expectation, we found increased suppression of PEV in homozygous *Zhr<sup>1</sup>* females that lack *roX* (Fig 5A, right). However, no suppression of PEV was observed in homozygous *Zhr<sup>1</sup>* females with wild type *roX*. Suppression of PEV is thus not due solely to the differing chromatin content of *Zhr<sup>1</sup>* chromosomes. Our findings are consistent with an interaction between Top2 and X heterochromatin determining heterochromatin sensitivity to *roX*, but do not support the hypothesis that unpaired chromatin in the XY or XO nucleus is a factor.

The suppression of PEV in *roX* females with one or two *Zhr<sup>1</sup>* alleles is weak (contrast with suppression of PEV in *roX1 roX2* males, Fig 3B). To determine if the effects of *Top2* and *Zhr<sup>1</sup>* mutations are additive, we generated *Zhr<sup>1</sup>/+* females mutated for *Top2* and compared PEV in the presence and absence of *roX*. These females displayed greater suppression of PEV upon loss of *roX* than females mutated for *Zhr<sup>1</sup>* or *Top2* alone, supporting the idea that *Top2* and pericentric X heterochromatin act together (Fig 5B).

If the dose of X-heterochromatin acts as a signal for karyotype, duplication of this region in XY flies should feminize their heterochromatin. We attempted to generate XY flies with a duplication of X heterochromatin on the Y chromosome (*Zhr<sup>+</sup> Y*) to test this idea [11]. Unfortunately, no *roX1 roX2/Zhr<sup>+</sup> Y* males were recovered, suggesting a genetic incompatibility between chromosomes in this mating.

## Discussion

Autosomal heterochromatin is typically not thought of as differing in males and females, but sexually dimorphic PEV has also been observed in mice, where a variegating transgene is more highly expressed in females [50]. This study found that both *SRY* and sex chromosome karyotype determine silencing. Importantly, this reveals that sexual dimorphism of autosomal heterochromatin is not limited to *Drosophila*. One attractive possibility is that both male and female flies require *roX* RNA for heterochromatic silencing, but male heterochromatin is more sensitive to loss of *roX*. The idea that *roX* RNAs might in fact also function in females is supported by the modest suppression of PEV sometimes observed in *roX1 roX2* females (Figs 4B, 5A and 5B). Although the *roX* RNAs are typically thought of as male-limited, *roX1* is abundantly expressed in early embryos of both sexes, and thus is available in females [51]. While we do not yet understand the rationale for the sex differences in autosomal heterochromatin in flies, the presence of a large, heterochromatic Y chromosome ensures that males have considerably more total heterochromatin than females. It is plausible that the chromatin content of XY cells drove a compensatory adaptation in male flies [8, 9].

The identification of *Top2* as a regulator of heterochromatic sexual dimorphism suggests that maintenance of normal chromatin organization plays a role in sex differences based on karyotype. However, the involvement of *Top2* in numerous processes complicates analysis. For example, *Top2* is itself required to maintain PEV in otherwise wild type males, but not in females. This provides additional evidence for the sexual dimorphism of autosomal heterochromatin, and is in agreement with a role for *Top2* in chromatin condensation [52, 53]. However, it also suggests dual roles for *Top2* in karyotype detection and heterochromatin maintenance.

*Top2* has been reported to participate in the male-limited process of dosage compensation in studies using chemical inhibition or RNAi knockdown [45]. These manipulations produced

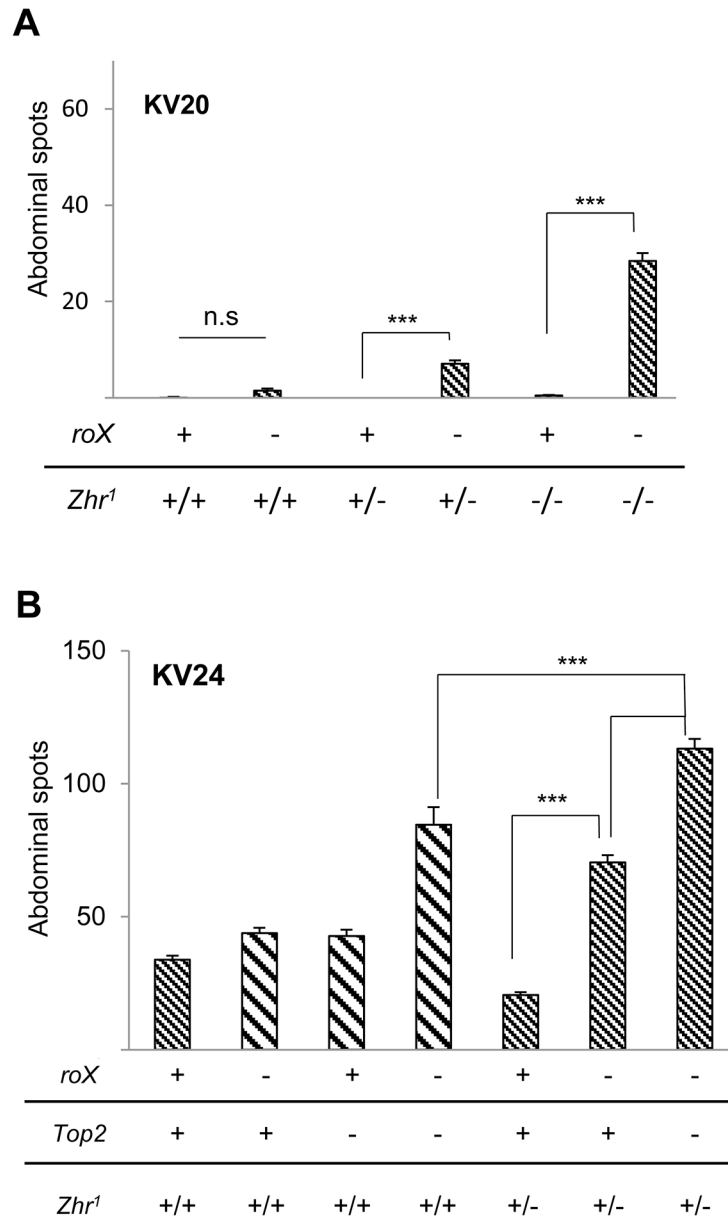

**Fig 5. Pericentromeric X heterochromatin contributes to feminization of autosomal heterochromatin in XX flies.** X heterochromatin was deleted by the X;Y translocation *Zhr1*. (A) Females with one or two *Zhr1* chromosomes suppress PEV upon loss of *roX*. The KV20 reporter, which normally produces <1 spot/abdomen, was used. *roX* and *Top2* mutations are indicated by (-). Full genotypes (left to right): *yw*; KV20/+, *yw roX1<sup>ex33</sup>roX2Δ*; KV20/+, *yw/yw Zhr1*; KV20/+, *yw roX1<sup>ex33</sup>roX2Δ* / *yw roX1<sup>ex33</sup>roX2Δ Zhr1*; KV20/+, *yw Zhr1/yw Zhr1*; KV20/+, *yw roX1<sup>ex33</sup>roX2Δ Zhr1* / *yw roX1<sup>ex33</sup>roX2Δ Zhr1*; KV20/+. Averages are derived from 20–50 flies of each genotype. \*\*\* indicates p-value <0.00001. (B) Loss of *Top2* further masculinizes heterochromatin in *Zhr1*/+ females. Greater suppression of PEV is observed in *roX* females mutated for *Top2* and with *Zhr1*. This study uses the KV24 reporter, producing about 30 spots/female in a wild type background. Full genotypes (left to right): *yw*; KV24 /+, *yw roX1<sup>ex33</sup>roX2Δ*; KV24 /+, *yw*; *Top2<sup>17-1</sup>/Top2<sup>17-3</sup>*; KV24 /+, *yw roX1<sup>ex33</sup>roX2Δ*; *Top2<sup>17-1</sup>/Top2<sup>17-3</sup>*; KV24 /+, *yw/yw Zhr1*; KV24 /+, *yw roX1<sup>ex33</sup>roX2Δ Zhr1* / *yw roX1<sup>ex33</sup>roX2Δ Zhr1*; KV24 /+, *yw roX1<sup>ex33</sup>roX2Δ Top2<sup>17-1</sup>/Top2<sup>17-3</sup>*; KV24 /+. Bars with coarse hatching are reproduced from Fig 4 for comparison. \*\*\* p-value <0.00001.

doi:10.1371/journal.pone.0128114.g005

a 2-fold reduction of expression in a plasmid-based model for dosage compensation. A physical association between *Top2* and a single member of the MSL complex, the RNA/DNA helicase



MLE, was also detected in these studies. Top2 has also been found with chromatin-bound MSL proteins in S2 cells, but, as Top2 is an abundant component of chromatin, this is unsurprising [54]. Our studies, performed with heteroallelic Top2 mutants, confirm a genetic interaction between MLE and Top2, but this appears equally important in males and females, and thus not limited to dosage compensation. The different methods by which Top2 activity was reduced in these studies may be responsible for this disparity. Interactions between helicases and Top2 are prevalent in other species. Yeast Top2 binds the Sgs1 helicase and mammalian Top2 $\alpha$  interacts with BLM, the Bloom Syndrome helicase, and RNA helicase A, orthologous to MLE [55–57]. Disruption of the BLM-Top2 $\alpha$  interaction leads to chromosome damage, and Top2 interaction with Sgs1 is required for decatenation *in vivo*. These interactions are thus important for genomic integrity. The nature of the Top2-MLE interaction remains an interesting question. *Drosophila* Top2 does associate with RNA, and it is possible that the helicase activity of MLE regulates this association [58]. We speculate that overexpression of MLE stabilizes mutant Top2 or supports its activity, increasing the survival of Top2 mutants of both sexes. An intriguing possibility, suggested by the association of the DEAD/H box RNA helicase P68 with mouse centromeric repeats, is that MLE promotes recruitment of Top2 to the 359 bp repeats [59].

The identification of Top2 as a pairing promoter suggested that X chromosome pairing could signal karyotype, but questions about the functions that are deficient in Top2 mutants complicate interpretation. Some function must be retained in Top2<sup>17-1</sup>/Top2<sup>17-3</sup> mutants because adult escapers are recovered. However, embryos from Top2<sup>17-1</sup>/Top2<sup>17-3</sup> mothers fail to initiate development, revealing a requirement for maternally deposited wild type Top2. It is possible that maternal Top2 is also sufficient to rescue near-normal pairing, transvection and insulation in Top2<sup>17-1</sup>/Top2<sup>17-3</sup> flies. Indeed, studies with a similar heteroallelic Top2 combination found no defect in pairing of the 359 bp repeats [44]. This study, like ours, used larvae that received maternal Top2, potentially obscuring a requirement for Top2 in this process.

Top2 is enriched on the pericentric 359 bp repeats, and deletion of X-heterochromatin additively enhances masculinization of autosomal heterochromatin by Top2 mutations. This prompted the idea that differences in karyotype may be detected by interaction of Top2 and a sequence within X-heterochromatin, possibly the 359 bp repeats. Several scenarios for how this might occur are possible. XX flies have double the X-heterochromatin of XY flies. An absolute difference in the amount of Top2-bound X heterochromatin could distinguish the male and female karyotypes (Fig 6A, left). It is also possible that higher free Top2 in males, with a single copy of the 359 bp repeats, is the source of a karyotype-specific signal (Fig 6A, right). This idea is supported by enhanced masculinization upon deletion of X heterochromatin. Although we obtained no evidence supporting the idea that unpaired chromatin signals the male karyotype, it remains possible that pairing of X heterochromatin, either dependent or independent of Top2, signals the XX karyotype (Fig 6B and 6C). For example, Top2-independent pairing of X-heterochromatin might occur, but association of Top2 with this region could be necessary to detect the paired status (Fig 6C).

Numerous sex determination strategies have arisen in heterogametic organisms. Each utilizes a primary signal that orchestrates the process of becoming female or male. Recent studies have highlighted the complexity of gene regulation at the bottom of the fly sex determination cascade [60–63]. In contrast, the chromosome counting mechanism at the top of the cascade was long thought to be the exclusive source of differences between the sexes [12, 31, 64]. Our findings suggest that the sex chromosomes of flies have additional ways of modulating phenotype. These findings are in accord with recent studies in multiple organisms documenting regulation by sex chromosome karyotype, rather than the conventional sex determination pathway (reviewed by [30]). Indeed, an analysis in fly heads revealed that most sex-biased gene regulation is not mediated by *tra* [61]. While some of this likely depends on upstream elements in the

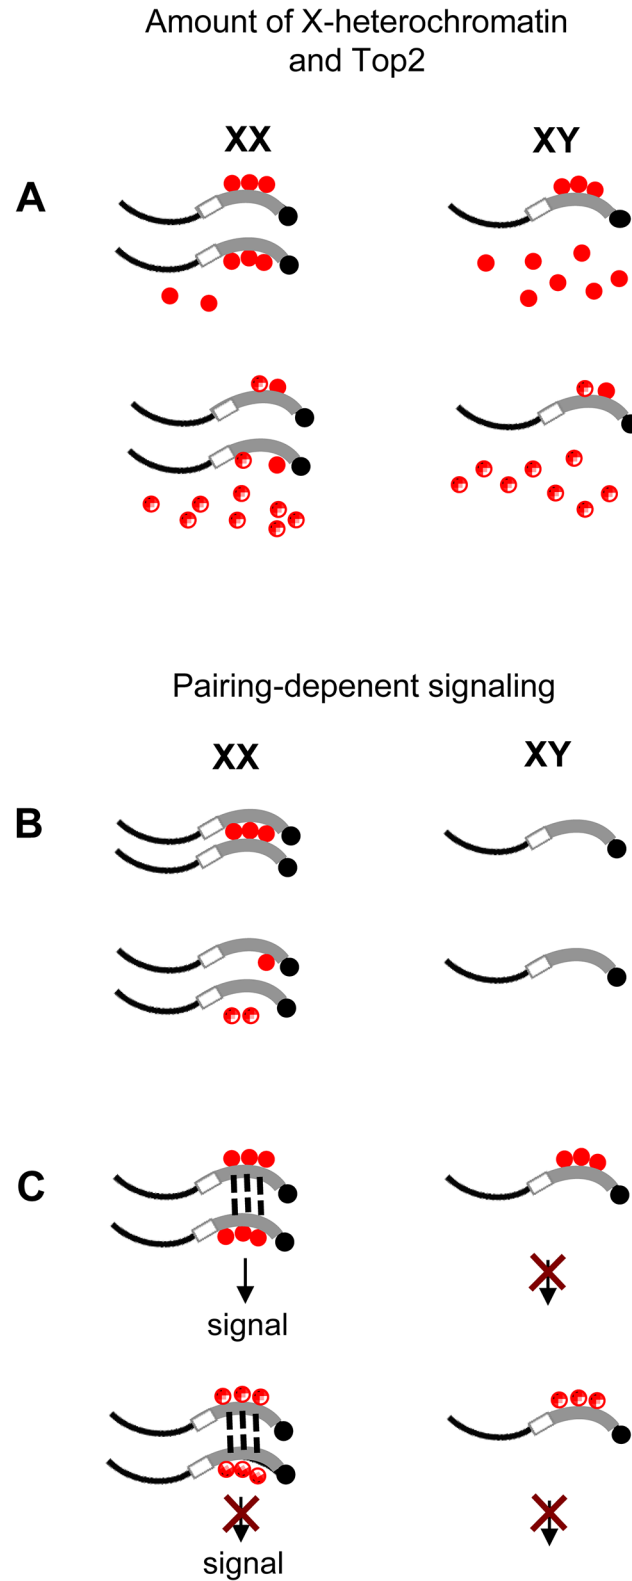

**Fig 6. Models for detection karyotype detection.** The absolute amount of X heterochromatin (A) or pairing of X heterochromatin (B, C) could generate a signal specifying the XX karyotype. XX flies have two copies of X heterochromatin (thick lines) but XY flies have one. Top2 (red) binds the 359 bp repeats (gray). (A) The absolute amount of Top2-bound 359 bp chromatin (top, left) or free Top2 in males (top, right) could generate

a karyotype-specific signal. Mutant Top2 (A, bottom) is deficient in a function necessary for generation of the signal. Non-359 bp X-heterochromatin is shown in white. (B) Top2-dependent pairing of X heterochromatin could signal the XX karyotype (top). Mutant Top2 (bottom) fails to support normal pairing. (C) Top2-independent pairing of X-heterochromatin requires Top2 to generate or transmit a signal. *Top2* mutants (bottom) are deficient in this process.

doi:10.1371/journal.pone.0128114.g006

sex determination and dosage compensation cascade, the regulatory basis of a significant proportion of the genes identified by this study remains unknown. Our current findings are most easily interpreted as evidence that chromosome-specific repetitive sequences, and proteins that interact with these sequences, produce differences in the nuclear environment that reflect sex chromosome karyotype. We postulate that this leads to the differences in male and female autosomal heterochromatin that we have observed. The universality of repetitive sequences and Top2 in higher eukaryotes suggests a general mechanism that could operate in other heterogametic organisms.

## Materials and Methods

### Fly strains

Flies were maintained at 25°C on standard cornmeal–agar fly food. Unless otherwise noted, mutations are described in [65]. *roX1* mutations have been described [10, 29, 66]. Elimination of *roX2* was accomplished by a viable deletion (*roX2Δ*) or a lethal deletion complemented by a cosmid carrying essential genes but lacking *roX2* [10] [26]. Variegating insertions used as reporters in this study are described [67, 68]. A 4<sup>th</sup> chromosome insertion of P[hsp26-pt, hsp70-*w*], marked with *w*<sup>+mW.hs</sup> (118E-10) and 2<sup>nd</sup> (KV20) and 3<sup>rd</sup> (KV24) chromosome insertions of P[SUPor-P], marked with *w*<sup>+mC</sup> and *yellow* (*y*<sup>+</sup>) reporters were used. These reporters were selected to facilitate stock construction, but key findings were validated with multiple reporters. *Top2*<sup>17-1</sup> and *Top2*<sup>17-3</sup> mutations were generously provided by A. Hohl, C. T. Wu and P. Geyer [41]. Additional mutations are as follows: *Cap-D3*<sup>c07081</sup> [69], *Cap-H2*<sup>Z0019</sup> [70], *MCPH1*<sup>0978</sup> [71], *Dhc64c*<sup>8-1</sup> [72], [*w*<sup>+</sup>-hsp83 MLE] [73], [*w*<sup>+</sup>-hsp83 MSL2]6I and [*w*<sup>+</sup>-hsp83 MSL1]Z1 [23, 74], 2XP(*w*<sup>+mC</sup>,*sisA*<sup>+</sup>)+2XP(*w*<sup>+mC</sup>,*sc*<sup>sisB+</sup>) [36, 75]. Descriptions of *Sxl*<sup>2593</sup>, *Sxl*<sup>M1F3</sup>, *Tra2*<sup>B</sup>, *Tra2*<sup>ts1</sup>, *Dsx*<sup>1</sup>, *Dsx*<sup>D</sup>, *Top2*<sup>17-1</sup>, *Top2*<sup>17-3</sup>, *Cap-D3*<sup>c07081</sup>, *Cap-H2*<sup>Z0019</sup>, *MCPH1*<sup>0978</sup>, *Dhc64c*<sup>6-10</sup>, *Dhc64c*<sup>8-1</sup>, *fs* (1)*h*<sup>1</sup>, *Zhr*<sup>+</sup> Y and *Zhr*<sup>1</sup> are available on Flybase (<http://www.flybase.org>). All other strains used in this study were obtained from the Bloomington Drosophila Stock Center.

### Transvection and insulator assays

Restoration of pigmentation by transvection at *y* is a standard measure of homolog pairing [76–78]. Pigmentation was scored in 1–2 days old flies on a scale of 1–4, where 1 is the no pigmentation and 4 is wild type levels. At least 100 flies of each genotype were scored. The *y*<sup>2</sup> *Gypsy* insertion contains an insulator that disrupts communication between the *y* enhancer and promoter [76]. Flies were aged for 24 h before scoring on the pigmentation scale described above. At least 25 flies from two independent crosses were scored. Significance was determined by a Student's T-test. Images were obtained using a Zeiss Discovery V8 stereo microscope.

## Supporting Information

**S1 Fig. Suppression of PEV in *roX1 roX2* males is independent of reporter or insertion site.** PEV of *y*<sup>+</sup> in KV24 (3<sup>rd</sup> chromosome) is visible as black abdominal spots in both sexes and is suppressed in *roX* males (top), but not in *roX* females (bottom). PEV of *w*<sup>+mW.hs</sup> in 118E-10 (4<sup>th</sup> chromosome) is detected by eye pigmentation. *roX* males (top), but not females (bottom),

suppress 118E-10 PEV. 118E-10 was examined in the *yw roX1<sup>ex33</sup> Df(1)52;[4A4.3]/+* background, which is mutated for *roX1* and *roX2* and lacks other *w* markers, enabling visualization of the *w<sup>+mW.hs</sup>* reporter.

(PDF)

**S2 Fig. Pairing regulators that do not affect heterochromatic sex.** Heterochromatic sex was determined in flies mutated for anti-pairers (*Cap-H2*, *Cap-D3* and *fs(1)h*) and pairing promoters (*MCPH1* and *Dhc64c*). All flies carried the *y<sup>+</sup>* KV20 reporter. Flies mutated for each pairing regulator were generated in wild type (++) and *yw roX1<sup>ex33</sup> roX2Δ* mutant backgrounds. Almost no abdominal pigmentation was observed in XX flies wild type (white) or mutated (hatched) for both *roX* genes. In contrast, PEV in XY flies (black) is suppressed in *roX* mutants (dark gray). A slight enhancement of PEV is detected in *Cap-D3* mutant flies, consistent with previous reports of condensin mutations as PEV enhancers [79, 80]. Fifteen–50 flies were counted for each genotype.

(PDF)

**S3 Fig. *Top2<sup>17-1</sup>/Top2<sup>17-3</sup>* mutants are deficient in specific functions.** A) The *Top2* mutations disrupt different domains. Missense mutations *Top2<sup>17-1</sup>* (WHD domain) and *Top2<sup>17-3</sup>* (TOPRIM domain). B) *Top2<sup>17-1</sup>/Top2<sup>17-3</sup>* males are fertile but *Top2<sup>17-1</sup>/Top2<sup>17-3</sup>* females are sterile. Both mutations are homozygous lethal. C) Characteristic abnormalities in a polytene preparation from a *Top2<sup>17-1</sup>/Top2<sup>17-3</sup>* male larvae. A puffy X chromosome (black arrow) and homolog unpairing (white arrows) are visible. One hundred–250 nuclei from at least 5 larvae were scored for each genotype. D) Transvection restores *yellow* expression. *y<sup>82f29</sup>* is a deletion of upstream enhancer elements. *y<sup>1#8</sup>* retains enhancers but lacks a promoter. *y<sup>3c3</sup>* lacks a bristle enhancer and the promoter, but retains a wing enhancer. Pairing between *y<sup>82f29</sup>* and *y<sup>1#8</sup>* or *y<sup>3c3</sup>* enables enhancers on the homolog to drive the *y<sup>82f29</sup>* promoter, restoring expression. Drawing based on [77]. Wing and body pigmentation was ranked from 1 (no pigmentation) to 4 (wild type). Flies homozygous for each allele have light body and wing color (1,1). Transvection in *y<sup>82f29</sup>/y<sup>1#8</sup>* flies restores wing and body color near wild-type levels (3, 3). Transvection in *y<sup>82f29</sup>/y<sup>3c3</sup>* flies restores wing pigmentation only (3, 1). Transvection is not disrupted in *Top2<sup>17-1</sup>/Top2<sup>17-3</sup>* mutants (shaded). Flies were aged 1–2 days before scoring and photography. At least 100 flies were scored for each genotype. E) Representative abdomens showing *y* transvection. Full genotypes are: *y<sup>82f29</sup>/y<sup>1#8</sup>*; *Top2<sup>m</sup>/Cyo*, *y<sup>82f29</sup>/y<sup>1#8</sup>*; *Top2<sup>17-1</sup>/Top2<sup>17-3</sup>*. F) *Top2* mutations do not disrupt *Gypsy* insulation. Loss of pigmentation in *y<sup>2</sup>* requires the *Top2*-dependent *Gypsy* insulator. Loss of insulation enhances body pigmentation. Full genotypes are: *y<sup>2</sup>/Y*; +/+; *y<sup>2</sup>/Y*; *Top2<sup>m</sup>/CyO* and *y<sup>2</sup>/Y*; *Top2<sup>17-1</sup>/Top2<sup>17-3</sup>*. At least 25 flies of each genotype were aged for 24 h before scoring.

(PDF)

**S1 Table. Polytene preparations from *Top2* mutants display altered X-chromosome morphology and disrupted pairing.** Polytene preparations from control (+/+, reference *yw* strain) and *yw*; *Top2<sup>17-1</sup>/Top2<sup>17-3</sup>* larvae were examined for disrupted morphology and local unpairing. The incidence of abnormality, and total nuclei scored, is in parentheses. Chromosomes with a diffuse banding pattern and those bloated along the entire chromosome length were scored as abnormal. Nuclei with any visible unpairing of homologs was scored as positive for unpairing.

(PDF)

## Acknowledgments

We thank Drs. A. Hohl, P. Geyer, C.T. Wu, J. Erickson, P. Ferree, J. Lucchessi, S. Elgin, G. Karpen, G. Bosco, M. Longworth, L.A. Lee, W. Hays and R. Kelley for generously providing fly strains. We are grateful to Dr. A. Hohl for sharing her PhD dissertation with us, and J. Butts for assistance in preparation of this manuscript. The Bloomington Drosophila Stock Center (NIH P40OD018537) provided strains used in this work.

## Author Contributions

Conceived and designed the experiments: MA VM. Performed the experiments: MA. Analyzed the data: MA. Contributed reagents/materials/analysis tools: MA VM. Wrote the paper: MA VM.

## References

1. Smith CD, Shu S, Mungall CJ, Karpen GH. The Release 5.1 annotation of *Drosophila melanogaster* heterochromatin. *Science*. 2007; 316(5831):1586–91. doi: [10.1126/science.1139815](https://doi.org/10.1126/science.1139815) PMID: [17569856](https://pubmed.ncbi.nlm.nih.gov/17569856/); PubMed Central PMCID: PMC2819280.
2. Huisinga KL, Brower-Toland B, Elgin SC. The contradictory definitions of heterochromatin: transcription and silencing. *Chromosoma*. 2006; 115(2):110–22. doi: [10.1007/s00412-006-0052-x](https://doi.org/10.1007/s00412-006-0052-x) PMID: [16506022](https://pubmed.ncbi.nlm.nih.gov/16506022/).
3. Elgin SC, Reuter G. Position-effect variegation, heterochromatin formation, and gene silencing in *Drosophila*. *Cold Spring Harbor perspectives in biology*. 2013; 5(8):a017780. doi: [10.1101/cshperspect.a017780](https://doi.org/10.1101/cshperspect.a017780) PMID: [23906716](https://pubmed.ncbi.nlm.nih.gov/23906716/).
4. Gatti M, Pimpinelli S. Functional elements in *Drosophila melanogaster* heterochromatin. *Annual review of genetics*. 1992; 26:239–75. doi: [10.1146/annurev.ge.26.120192.001323](https://doi.org/10.1146/annurev.ge.26.120192.001323) PMID: [1482113](https://pubmed.ncbi.nlm.nih.gov/1482113/).
5. Yasuhara JC, Wakimoto BT. Oxymoron no more: the expanding world of heterochromatic genes. *Trends in genetics: TIG*. 2006; 22(6):330–8. doi: [10.1016/j.tig.2006.04.008](https://doi.org/10.1016/j.tig.2006.04.008) PMID: [16690158](https://pubmed.ncbi.nlm.nih.gov/16690158/).
6. Lu BY, Emtage PC, Duyf BJ, Hilliker AJ, Eissenberg JC. Heterochromatin protein 1 is required for the normal expression of two heterochromatin genes in *Drosophila*. *Genetics*. 2000; 155(2):699–708. PMID: [10835392](https://pubmed.ncbi.nlm.nih.gov/10835392/); PubMed Central PMCID: PMC1461102.
7. Schulze SR, McAllister BF, Sinclair DA, Fitzpatrick KA, Marchetti M, Pimpinelli S, et al. Heterochromatic genes in *Drosophila*: a comparative analysis of two genes. *Genetics*. 2006; 173(3):1433–45. doi: [10.1534/genetics.106.056069](https://doi.org/10.1534/genetics.106.056069) PMID: [16648646](https://pubmed.ncbi.nlm.nih.gov/16648646/); PubMed Central PMCID: PMC1526689.
8. Liu LP, Ni JQ, Shi YD, Oakeley EJ, Sun FL. Sex-specific role of *Drosophila melanogaster* HP1 in regulating chromatin structure and gene transcription. *Nat Genet*. 2005; 37(12):1361–6. doi: [10.1038/ng1662](https://doi.org/10.1038/ng1662) PMID: [16258543](https://pubmed.ncbi.nlm.nih.gov/16258543/).
9. Deng X, Koya SK, Kong Y, Meller VH. Coordinated regulation of heterochromatic genes in *Drosophila melanogaster* males. *Genetics*. 2009; 182(2):481–91. doi: [10.1534/genetics.109.102087](https://doi.org/10.1534/genetics.109.102087) PMID: [19307603](https://pubmed.ncbi.nlm.nih.gov/19307603/); PubMed Central PMCID: PMC2691757.
10. Meller VH, Rattner BP. The roX genes encode redundant male-specific lethal transcripts required for targeting of the MSL complex. *The EMBO journal*. 2002; 21(5):1084–91. doi: [10.1093/emboj/21.5.1084](https://doi.org/10.1093/emboj/21.5.1084) PMID: [11867536](https://pubmed.ncbi.nlm.nih.gov/11867536/); PubMed Central PMCID: PMC125901.
11. Ferree PM, Barbash DA. Species-specific heterochromatin prevents mitotic chromosome segregation to cause hybrid lethality in *Drosophila*. *PLoS biology*. 2009; 7(10):e1000234. doi: [10.1371/journal.pbio.1000234](https://doi.org/10.1371/journal.pbio.1000234) PMID: [19859525](https://pubmed.ncbi.nlm.nih.gov/19859525/); PubMed Central PMCID: PMC2760206.
12. Salz HK, Erickson JW. Sex determination in *Drosophila*: The view from the top. *Fly*. 2010; 4(1):60–70. PMID: [20160499](https://pubmed.ncbi.nlm.nih.gov/20160499/); PubMed Central PMCID: PMC2855772.
13. Boggs RT, Gregor P, Idriss S, Belote JM, McKeown M. Regulation of sexual differentiation in *D. melanogaster* via alternative splicing of RNA from the transformer gene. *Cell*. 1987; 50(5):739–47. PMID: [2441872](https://pubmed.ncbi.nlm.nih.gov/2441872/).
14. Cline TW. The interaction between daughterless and sex-lethal in triploids: a lethal sex-transforming maternal effect linking sex determination and dosage compensation in *Drosophila melanogaster*. *Developmental biology*. 1983; 95(2):260–74. PMID: [6402396](https://pubmed.ncbi.nlm.nih.gov/6402396/).
15. Salz HK, Cline TW, Schedl P. Functional changes associated with structural alterations induced by mobilization of a P element inserted in the Sex-lethal gene of *Drosophila*. *Genetics*. 1987; 117(2):221–31. PMID: [2822534](https://pubmed.ncbi.nlm.nih.gov/2822534/); PubMed Central PMCID: PMC1203199.



16. Bashaw GJ, Baker BS. The regulation of the *Drosophila* *msl-2* gene reveals a function for Sex-lethal in translational control. *Cell*. 1997; 89(5):789–98. PMID: [9182767](#).
17. Gebauer F, Merendino L, Hentze MW, Valcarcel J. The *Drosophila* splicing regulator sex-lethal directly inhibits translation of male-specific-lethal 2 mRNA. *Rna*. 1998; 4(2):142–50. PMID: [9570314](#); PubMed Central PMCID: PMC1369603.
18. Kelley RL, Wang J, Bell L, Kuroda MI. Sex lethal controls dosage compensation in *Drosophila* by a non-splicing mechanism. *Nature*. 1997; 387(6629):195–9. doi: [10.1038/387195a0](#) PMID: [9144292](#).
19. Lemos B, Araripe LO, Hartl DL. Polymorphic Y chromosomes harbor cryptic variation with manifold functional consequences. *Science*. 2008; 319(5859):91–3. doi: [10.1126/science.1148861](#) PMID: [18174442](#).
20. Weiler KS, Wakimoto BT. Heterochromatin and gene expression in *Drosophila*. *Annual review of genetics*. 1995; 29:577–605. doi: [10.1146/annurev.ge.29.120195.003045](#) PMID: [8825487](#).
21. Ilik IA, Quinn JJ, Georgiev P, Tavares-Cadete F, Maticzka D, Toscano S, et al. Tandem stem-loops in roX RNAs act together to mediate X chromosome dosage compensation in *Drosophila*. *Mol Cell*. 2013; 51(2):156–73. doi: [10.1016/j.molcel.2013.07.001](#) PMID: [23870142](#); PubMed Central PMCID: PMC3804161.
22. Maenner S, Muller M, Frohlich J, Langer D, Becker PB. ATP-dependent roX RNA remodeling by the helicase maleless enables specific association of MSL proteins. *Mol Cell*. 2013; 51(2):174–84. doi: [10.1016/j.molcel.2013.06.011](#) PMID: [23870143](#).
23. Kelley RL, Solovyeva I, Lyman LM, Richman R, Solovyev V, Kuroda MI. Expression of *msl-2* causes assembly of dosage compensation regulators on the X chromosomes and female lethality in *Drosophila*. *Cell*. 1995; 81(6):867–77. PMID: [7781064](#).
24. Bellen HJ, Levis RW, Liao G, He Y, Carlson JW, Tsang G, et al. The BDGP gene disruption project: single transposon insertions associated with 40% of *Drosophila* genes. *Genetics*. 2004; 167(2):761–81. doi: [10.1534/genetics.104.026427](#) PMID: [15238527](#); PubMed Central PMCID: PMC1470905.
25. Konev AY, Yan CM, Acevedo D, Kennedy C, Ward E, Lim A, et al. Genetics of P-element transposition into *Drosophila melanogaster* centric heterochromatin. *Genetics*. 2003; 165(4):2039–53. PMID: [14704184](#); PubMed Central PMCID: PMC1462875.
26. Menon DU, Meller VH. A role for siRNA in X-chromosome dosage compensation in *Drosophila melanogaster*. *Genetics*. 2012; 191(3):1023–8. doi: [10.1534/genetics.112.140236](#) PMID: [22554892](#); PubMed Central PMCID: PMC3389965.
27. Bai X, Alekseyenko AA, Kuroda MI. Sequence-specific targeting of MSL complex regulates transcription of the roX RNA genes. *EMBO J*. 2004; 23(14):2853–61. doi: [10.1038/sj.emboj.7600299](#) PMID: [15229655](#); PubMed Central PMCID: PMC514957.
28. Rattner BP, Meller VH. *Drosophila* male-specific lethal 2 protein controls sex-specific expression of the roX genes. *Genetics*. 2004; 166(4):1825–32. PMID: [15126401](#); PubMed Central PMCID: PMC1470808.
29. Meller VH, Wu KH, Roman G, Kuroda MI, Davis RL. roX1 RNA paints the X chromosome of male *Drosophila* and is regulated by the dosage compensation system. *Cell*. 1997; 88(4):445–57. PMID: [9038336](#).
30. Arnold AP. The end of gonad-centric sex determination in mammals. *Trends in genetics: TIG*. 2012; 28(2):55–61. doi: [10.1016/j.tig.2011.10.004](#) PMID: [22078126](#); PubMed Central PMCID: PMC3268825.
31. Erickson JW, Cline TW. Key aspects of the primary sex determination mechanism are conserved across the genus *Drosophila*. *Development*. 1998; 125(16):3259–68. PMID: [9671597](#).
32. Erickson JW, Cline TW. A bZIP protein, *sisterless-a*, collaborates with bHLH transcription factors early in *Drosophila* development to determine sex. *Genes Dev*. 1993; 7(9):1688–702. PMID: [8370520](#).
33. Van Doren M, Ellis HM, Posakony JW. The *Drosophila* extramacrochaetae protein antagonizes sequence-specific DNA binding by daughterless/achaete-scute protein complexes. *Development*. 1991; 113(1):245–55. PMID: [1764999](#).
34. Younger-Shepherd S, Vaessin H, Bier E, Jan LY, Jan YN. *deadpan*, an essential pan-neural gene encoding an HLH protein, acts as a denominator in *Drosophila* sex determination. *Cell*. 1992; 70(6):911–22. PMID: [1525829](#).
35. Sefton L, Timmer JR, Zhang Y, Beranger F, Cline TW. An extracellular activator of the *Drosophila* JAK/STAT pathway is a sex-determination signal element. *Nature*. 2000; 405(6789):970–3. doi: [10.1038/35016119](#) PMID: [10879541](#).
36. Cline TW. Evidence that *sisterless-a* and *sisterless-b* are two of several discrete "numerator elements" of the X/A sex determination signal in *Drosophila* that switch Sxl between two alternative stable expression states. *Genetics*. 1988; 119(4):829–62. PMID: [3137120](#); PubMed Central PMCID: PMC1203469.

37. Apte MS, Meller VH. Homologue pairing in flies and mammals: gene regulation when two are involved. *Genetics research international*. 2012; 2012:430587. doi: [10.1155/2012/430587](https://doi.org/10.1155/2012/430587) PMID: [22567388](https://pubmed.ncbi.nlm.nih.gov/22567388/); PubMed Central PMCID: PMC3335585.
38. Stevens N. A study of the germ cells of certain Diptera with reference to the heterochromosomes and the phenomena of synapsis. *J Exp Zool*. 1908; 5:359–74.
39. Williams BR, Bateman JR, Novikov ND, Wu CT. Disruption of topoisomerase II perturbs pairing in *Drosophila* cell culture. *Genetics*. 2007; 177(1):31–46. doi: [10.1534/genetics.107.076356](https://doi.org/10.1534/genetics.107.076356) PMID: [17890361](https://pubmed.ncbi.nlm.nih.gov/17890361/); PubMed Central PMCID: PMC2013714.
40. Joyce EF, Williams BR, Xie T, Wu CT. Identification of genes that promote or antagonize somatic homolog pairing using a high-throughput FISH-based screen. *PLoS genetics*. 2012; 8(5):e1002667. doi: [10.1371/journal.pgen.1002667](https://doi.org/10.1371/journal.pgen.1002667) PMID: [22589731](https://pubmed.ncbi.nlm.nih.gov/22589731/); PubMed Central PMCID: PMC3349724.
41. Hohl AM, Thompson M, Soshnev AA, Wu J, Morris J, Hsieh TS, et al. Restoration of topoisomerase 2 function by complementation of defective monomers in *Drosophila*. *Genetics*. 2012; 192(3):843–56. doi: [10.1534/genetics.112.144006](https://doi.org/10.1534/genetics.112.144006) PMID: [22923380](https://pubmed.ncbi.nlm.nih.gov/22923380/); PubMed Central PMCID: PMC3522162.
42. Hughes SE, Hawley RS. Topoisomerase II Is Required for the Proper Separation of Heterochromatic Regions during *Drosophila melanogaster* Female Meiosis. *PLoS genetics*. 2014; 10(10):e1004650. doi: [10.1371/journal.pgen.1004650](https://doi.org/10.1371/journal.pgen.1004650) PMID: [25340780](https://pubmed.ncbi.nlm.nih.gov/25340780/); PubMed Central PMCID: PMC4207608.
43. Ramos E, Torre EA, Bushey AM, Gurudatta BV, Corces VG. DNA topoisomerase II modulates insulator function in *Drosophila*. *PloS one*. 2011; 6(1):e16562. doi: [10.1371/journal.pone.0016562](https://doi.org/10.1371/journal.pone.0016562) PMID: [21304601](https://pubmed.ncbi.nlm.nih.gov/21304601/); PubMed Central PMCID: PMC3029388.
44. Hohl AM. Understanding the role of Topoisomerase 2 in chromosome associations. PhD (Doctor of Philosophy) Thesis. [PhD Thesis]: University of Iowa; 2012.
45. Cugusi S, Ramos E, Ling H, Yokoyama R, Luk KM, Lucchesi JC. Topoisomerase II plays a role in dosage compensation in *Drosophila*. *Transcription*. 2013; 4(5):238–50. PMID: [23989663](https://pubmed.ncbi.nlm.nih.gov/23989663/).
46. Lohe AR, Hilliker AJ, Roberts PA. Mapping simple repeated DNA sequences in heterochromatin of *Drosophila melanogaster*. *Genetics*. 1993; 134(4):1149–74. PMID: [8375654](https://pubmed.ncbi.nlm.nih.gov/8375654/); PubMed Central PMCID: PMC1205583.
47. Kas E, Laemmli UK. In vivo topoisomerase II cleavage of the *Drosophila* histone and satellite III repeats: DNA sequence and structural characteristics. *The EMBO journal*. 1992; 11(2):705–16. PMID: [1311255](https://pubmed.ncbi.nlm.nih.gov/1311255/); PubMed Central PMCID: PMC556503.
48. Sawamura K, Yamamoto MT. Cytogenetical localization of Zygotic hybrid rescue (*Zhr*), a *Drosophila melanogaster* gene that rescues interspecific hybrids from embryonic lethality. *Molecular & general genetics: MGG*. 1993; 239(3):441–9. PMID: [8316215](https://pubmed.ncbi.nlm.nih.gov/8316215/).
49. Sawamura K, Yamamoto MT, Watanabe TK. Hybrid lethal systems in the *Drosophila melanogaster* species complex. II. The Zygotic hybrid rescue (*Zhr*) gene of *D. melanogaster*. *Genetics*. 1993; 133(2):307–13. PMID: [8436277](https://pubmed.ncbi.nlm.nih.gov/8436277/); PubMed Central PMCID: PMC1205321.
50. Wijchers PJ, Yandim C, Panousopoulou E, Ahmad M, Harker N, Saveliev A, et al. Sexual dimorphism in mammalian autosomal gene regulation is determined not only by *Sry* but by sex chromosome complement as well. *Developmental cell*. 2010; 19(3):477–84. doi: [10.1016/j.devcel.2010.08.005](https://doi.org/10.1016/j.devcel.2010.08.005) PMID: [20833369](https://pubmed.ncbi.nlm.nih.gov/20833369/).
51. Meller VH. Initiation of dosage compensation in *Drosophila* embryos depends on expression of the roX RNAs. *Mechanisms of development*. 2003; 120(7):759–67. PMID: [12915227](https://pubmed.ncbi.nlm.nih.gov/12915227/).
52. Tsai SC, Valkov N, Yang WM, Gump J, Sullivan D, Seto E. Histone deacetylase interacts directly with DNA topoisomerase II. *Nat Genet*. 2000; 26(3):349–53. doi: [10.1038/81671](https://doi.org/10.1038/81671) PMID: [11062478](https://pubmed.ncbi.nlm.nih.gov/11062478/).
53. Lupo R, Breiling A, Bianchi ME, Orlando V. *Drosophila* chromosome condensation proteins Topoisomerase II and Barren colocalize with Polycomb and maintain Fab-7 PRE silencing. *Mol Cell*. 2001; 7(1):127–36. PMID: [11172718](https://pubmed.ncbi.nlm.nih.gov/11172718/).
54. Wang CI, Alekseyenko AA, LeRoy G, Elia AE, Gorchakov AA, Britton LM, et al. Chromatin proteins captured by ChIP-mass spectrometry are linked to dosage compensation in *Drosophila*. *Nature structural & molecular biology*. 2013; 20(2):202–9. doi: [10.1038/nsmb.2477](https://doi.org/10.1038/nsmb.2477) PMID: [23295261](https://pubmed.ncbi.nlm.nih.gov/23295261/); PubMed Central PMCID: PMC3674866.
55. Zhou K, Choe KT, Zaidi Z, Wang Q, Mathews MB, Lee CG. RNA helicase A interacts with dsDNA and topoisomerase IIalpha. *Nucleic Acids Res*. 2003; 31(9):2253–60. PMID: [12711669](https://pubmed.ncbi.nlm.nih.gov/12711669/); PubMed Central PMCID: PMC154214.
56. Russell B, Bhattacharyya S, Keirse J, Sandy A, Grierson P, Perchiniak E, et al. Chromosome breakage is regulated by the interaction of the BLM helicase and topoisomerase IIalpha. *Cancer Res*. 2011; 71(2):561–71. doi: [10.1158/0008-5472.CAN-10-1727](https://doi.org/10.1158/0008-5472.CAN-10-1727) PMID: [21224348](https://pubmed.ncbi.nlm.nih.gov/21224348/); PubMed Central PMCID: PMC3548318.

57. Watt PM, Louis EJ, Borts RH, Hickson ID. Sgs1: a eukaryotic homolog of E. coli RecQ that interacts with topoisomerase II in vivo and is required for faithful chromosome segregation. *Cell*. 1995; 81(2):253–60. PMID: [7736577](#).
58. Meller VH, McConnell M, Fisher PA. An RNase-sensitive particle containing *Drosophila melanogaster* DNA topoisomerase II. *The Journal of cell biology*. 1994; 126(6):1331–40. PMID: [8089168](#); PubMed Central PMCID: PMC2290960.
59. Erukashvily N, Donev R, Sheer D, Podgornaya O. Satellite DNA binding and cellular localisation of RNA helicase P68. *Journal of cell science*. 2005; 118(Pt 3):611–22. doi: [10.1242/jcs.01605](#) PMID: [15657085](#).
60. Ito H, Sato K, Koganezawa M, Ote M, Matsumoto K, Hama C, et al. Fruitless recruits two antagonistic chromatin factors to establish single-neuron sexual dimorphism. *Cell*. 2012; 149(6):1327–38. doi: [10.1016/j.cell.2012.04.025](#) PMID: [22682252](#).
61. Sanders LE, Arbeitman MN. Doublesex establishes sexual dimorphism in the *Drosophila* central nervous system in an isoform-dependent manner by directing cell number. *Developmental biology*. 2008; 320(2):378–90. doi: [10.1016/j.ydbio.2008.05.543](#) PMID: [18599032](#); PubMed Central PMCID: PMC2631280.
62. Hoxha V, Lama C, Chang PL, Saurabh S, Patel N, Olate N, et al. Sex-specific signaling in the blood-brain barrier is required for male courtship in *Drosophila*. *PLoS genetics*. 2013; 9(1):e1003217. doi: [10.1371/journal.pgen.1003217](#) PMID: [23359644](#); PubMed Central PMCID: PMC3554526.
63. Fagegaltier D, Konig A, Gordon A, Lai EC, Gingeras TR, Hannon GJ, et al. A Genome-Wide Survey of Sexually Dimorphic Expression of *Drosophila* miRNAs Identifies the Steroid Hormone-Induced miRNA let-7 as a Regulator of Sexual Identity. *Genetics*. 2014. doi: [10.1534/genetics.114.169268](#) PMID: [25081570](#).
64. Robinett CC, Vaughan AG, Knapp JM, Baker BS. Sex and the single cell. II. There is a time and place for sex. *PLoS biology*. 2010; 8(5):e1000365. doi: [10.1371/journal.pbio.1000365](#) PMID: [20454565](#); PubMed Central PMCID: PMC2864297.
65. Lindsley DL, Zimm GG. *The Genome of Drosophila melanogaster*. San Diego, California.: Academic Press,; 1992.
66. Deng X, Rattner BP, Souter S, Meller VH. The severity of roX1 mutations is predicted by MSL localization on the X chromosome. *Mechanisms of development*. 2005; 122(10):1094–105. doi: [10.1016/j.mod.2005.06.004](#) PMID: [16125915](#).
67. Yan CM, Dobie KW, Le HD, Konev AY, Karpen GH. Efficient recovery of centric heterochromatin P-element insertions in *Drosophila melanogaster*. *Genetics*. 2002; 161(1):217–29. PMID: [12019236](#); PubMed Central PMCID: PMC1462106.
68. Sun FL, Cuaycong MH, Craig CA, Wallrath LL, Locke J, Elgin SC. The fourth chromosome of *Drosophila melanogaster*: interspersed euchromatic and heterochromatic domains. *Proc Natl Acad Sci U S A*. 2000; 97(10):5340–5. doi: [10.1073/pnas.090530797](#) PMID: [10779561](#); PubMed Central PMCID: PMC25830.
69. Longworth MS, Herr A, Ji JY, Dyson NJ. RBF1 promotes chromatin condensation through a conserved interaction with the Condensin II protein dCAP-D3. *Genes Dev*. 2008; 22(8):1011–24. doi: [10.1101/gad.1631508](#) PMID: [18367646](#); PubMed Central PMCID: PMC2335323.
70. Hartl TA, Smith HF, Bosco G. Chromosome alignment and transvection are antagonized by condensin II. *Science*. 2008; 322(5906):1384–7. doi: [10.1126/science.1164216](#) PMID: [19039137](#).
71. Rickmyre JL, Dasgupta S, Ooi DL, Keel J, Lee E, Kirschner MW, et al. The *Drosophila* homolog of MCPH1, a human microcephaly gene, is required for genomic stability in the early embryo. *Journal of cell science*. 2007; 120(Pt 20):3565–77. doi: [10.1242/jcs.016626](#) PMID: [17895362](#).
72. Gepner J, Li M, Ludmann S, Kortas C, Boylan K, Iyadurai SJ, et al. Cytoplasmic dynein function is essential in *Drosophila melanogaster*. *Genetics*. 1996; 142(3):865–78. PMID: [8849893](#); PubMed Central PMCID: PMC1207024.
73. Morra R, Smith ER, Yokoyama R, Lucchesi JC. The MLE subunit of the *Drosophila* MSL complex uses its ATPase activity for dosage compensation and its helicase activity for targeting. *Molecular and cellular biology*. 2008; 28(3):958–66. doi: [10.1128/MCB.00995-07](#) PMID: [18039854](#); PubMed Central PMCID: PMC2223400.
74. Chang KA, Kuroda MI. Modulation of MSL1 abundance in female *Drosophila* contributes to the sex specificity of dosage compensation. *Genetics*. 1998; 150(2):699–709. PMID: [9755201](#); PubMed Central PMCID: PMC1460363.
75. Gonzalez AN, Lu H, Erickson JW. A shared enhancer controls a temporal switch between promoters during *Drosophila* primary sex determination. *Proc Natl Acad Sci U S A*. 2008; 105(47):18436–41. doi: [10.1073/pnas.0805993105](#) PMID: [19011108](#); PubMed Central PMCID: PMC2587594.

76. Geyer PK, Green MM, Corces VG. Tissue-specific transcriptional enhancers may act in trans on the gene located in the homologous chromosome: the molecular basis of transvection in *Drosophila*. *The EMBO journal*. 1990; 9(7):2247–56. PMID: [2162766](#); PubMed Central PMCID: PMC551949.
77. Morris JR, Chen JL, Geyer PK, Wu CT. Two modes of transvection: enhancer action in trans and bypass of a chromatin insulator in cis. *Proc Natl Acad Sci U S A*. 1998; 95(18):10740–5. PMID: [9724774](#); PubMed Central PMCID: PMC27965.
78. Morris JR, Chen J, Filandrinis ST, Dunn RC, Fisk R, Geyer PK, et al. An analysis of transvection at the yellow locus of *Drosophila melanogaster*. *Genetics*. 1999; 151(2):633–51. PMID: [9927457](#); PubMed Central PMCID: PMC1460495.
79. Dej KJ, Ahn C, Orr-Weaver TL. Mutations in the *Drosophila* condensin subunit dCAP-G: defining the role of condensin for chromosome condensation in mitosis and gene expression in interphase. *Genetics*. 2004; 168(2):895–906. doi: [10.1534/genetics.104.030908](#) PMID: [15514062](#); PubMed Central PMCID: PMC1448856.
80. Cobbe N, Savvidou E, Heck MM. Diverse mitotic and interphase functions of condensins in *Drosophila*. *Genetics*. 2006; 172(2):991–1008. doi: [10.1534/genetics.105.050567](#) PMID: [16272408](#); PubMed Central PMCID: PMC1456240.
