# Supplementary material for: Sex Differences in Drosophila melanogaster Heterochromatin Are Regulated by Non-Sex Specific Factors
Source: PubMed Central journal article supplement (PMC4459879; doi:10.1371/journal.pone.0128114), 2015-06-08

Suppression of PEV in *roX1 roX2* males is independent of insertion site or reporter

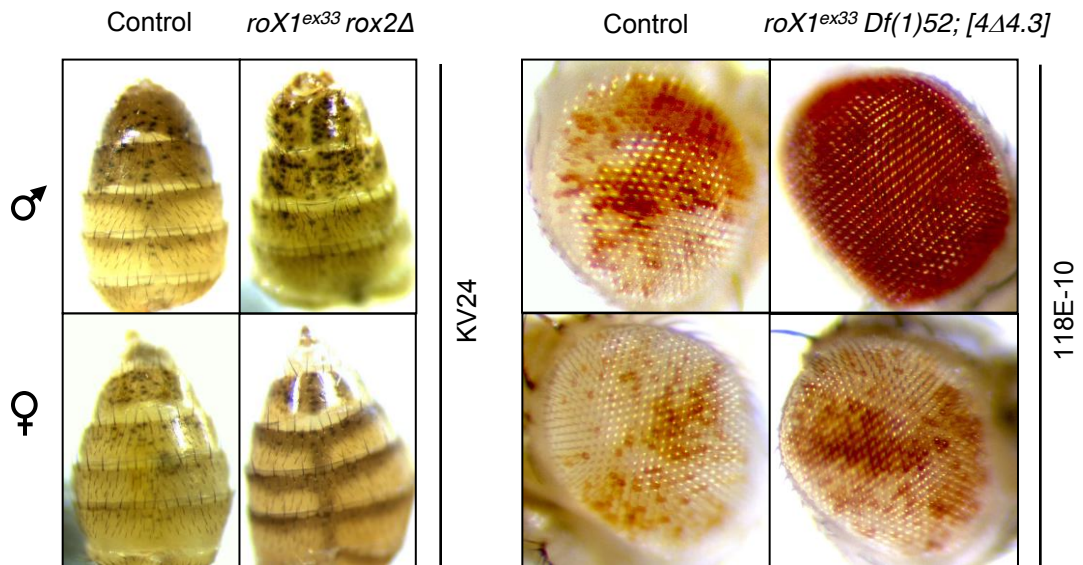

Supplement: pone.0128114.s001.pdf [file pone.0128114.s001.pdf]
