# Supplementary material for: Sex Differences in Drosophila melanogaster Heterochromatin Are Regulated by Non-Sex Specific Factors
Source: PubMed Central journal article supplement (PMC4459879; doi:10.1371/journal.pone.0128114), 2015-06-08
Supplement: pone.0128114.s004.pdf [file pone.0128114.s004.pdf]

Polytene chromosome structure in *Top2* mutants

| Genotype                                                  | Karyotype | Normal X                   | Abnormal or puffy X        | Unpairing                  |
|-----------------------------------------------------------|-----------|----------------------------|----------------------------|----------------------------|
| +/+                                                       | XX        | <b>95.26%</b><br>(161/169) | <b>4.74%</b><br>(8/169)    | <b>13.01%</b><br>(22/169)  |
|                                                           | XY        | <b>85.53%</b><br>(136/159) | <b>14.47%</b><br>(24/159)  | <b>15.72%</b><br>(25/159)  |
| <i>Top2</i> <sup>17-1</sup> / <i>Top2</i> <sup>17-3</sup> | XX        | <b>87.02%</b><br>(208/239) | <b>12.97%</b><br>(31/239)  | <b>47.69%</b><br>(114/239) |
|                                                           | XY        | <b>29.63%</b><br>(72/243)  | <b>70.37%</b><br>(171/243) | <b>54.73%</b><br>(133/243) |
